# Supplementary material for: Epidemiological Shifts in Ovarian Cancer Burden: Regional Differences and the Influence of Socioeconomic Factors
Source: Research Square preprint supplement (doi:10.21203/rs.3.rs-7031267/v1), 2025-08-08
Supplement: Supplementary file 1 [file 2d25589861875c3b4917aac4.docx]

| **Table S1** Global and regional incidence of OC in 1990 and 2021, and EAPC of ASR from 1990 to 2021 | | | | | |
| --- | --- | --- | --- | --- | --- |
| **Location** | **1990** | | **2021** | | **EAPC (95% CI)**  **1990-2021** |
| **Number (95% UIs)** | **ASR (95% UIs)** | **Number (95% UIs)** | **ASR (95% UIs)** |
| Afghanistan | 99.60 (39.29–242.30) | 2.73 (1.04–6.39) | 318.39 (165.55–749.55) | 4.23 (2.03–9.22) | 1.57 (1.37 to 1.77) |
| Albania | 36.60 (28.77–47.18) | 3.08 (2.44–3.92) | 68.70 (47.40–96.67) | 3.39 (2.35–4.65) | 0.78 (0.57 to 0.99) |
| Algeria | 140.12 (101.60–179.58) | 2.09 (1.48–2.70) | 516.37 (372.16–699.27) | 2.70 (1.92–3.62) | 1.02 (0.97 to 1.08) |
| American Samoa | 0.53 (0.33–0.71) | 3.77 (2.37–4.92) | 1.65 (0.84–2.44) | 6.63 (3.39–9.86) | 1.92 (1.82 to 2.02) |
| Andorra | 1.18 (0.76–1.78) | 4.16 (2.67–6.28) | 2.15 (1.44–2.92) | 3.03 (2.02–4.11) | -0.76 (-0.94 to -0.59) |
| Angola | 59.93 (31.27–95.73) | 2.44 (1.21–3.79) | 369.82 (192.75–561.60) | 4.29 (2.19–6.45) | 2.09 (1.96 to 2.23) |
| Antigua and Barbuda | 2.21 (1.99–2.43) | 7.58 (6.83–8.39) | 5.91 (5.45–6.42) | 10.33 (9.58–11.16) | 1.24 (1.09 to 1.39) |
| Argentina | 1674.10 (1506.13–1857.29) | 9.60 (8.64–10.65) | 2264.88 (2067.23–2462.28) | 7.88 (7.21–8.56) | -0.38 (-0.53 to -0.23) |
| Armenia | 92.00 (74.54–118.53) | 5.70 (4.65–7.29) | 166.54 (138.05–199.10) | 7.14 (5.91–8.58) | 0.99 (0.78 to 1.19) |
| Australia | 1521.83 (1390.87–1631.79) | 14.97 (13.71–16.04) | 1543.41 (1359.07–1694.03) | 7.20 (6.51–7.87) | -2.23 (-2.62 to -1.83) |
| Austria | 977.79 (918.75–1029.84) | 15.62 (14.69–16.52) | 714.18 (634.41–779.87) | 8.26 (7.49–8.96) | -1.83 (-1.92 to -1.73) |
| Azerbaijan | 103.10 (67.89–148.64) | 3.32 (2.18–4.77) | 264.49 (167.17–400.78) | 4.26 (2.72–6.46) | 1.23 (0.88 to 1.58) |
| Bahamas | 11.79 (10.18–14.16) | 11.57 (10.00–13.90) | 31.36 (24.87–38.88) | 13.50 (10.74–16.69) | 0.69 (0.58 to 0.79) |
| Bahrain | 10.00 (7.56–12.96) | 9.59 (7.25–12.47) | 51.26 (34.08–67.66) | 11.13 (7.53–14.40) | 0.23 (0.15 to 0.32) |
| Bangladesh | 892.29 (574.69–1335.12) | 3.43 (2.12–5.05) | 3899.95 (2337.65–6821.25) | 5.13 (3.15–8.96) | 1.2 (1.15 to 1.26) |
| Barbados | 15.02 (13.65–16.61) | 10.02 (9.07–11.13) | 25.29 (20.22–31.70) | 10.37 (8.25–13.08) | 0.47 (0.34 to 0.59) |
| Belarus | 515.77 (463.15–573.85) | 6.90 (6.20–7.72) | 663.68 (522.59–815.71) | 7.89 (6.14–9.81) | 0.23 (-0.29 to 0.75) |
| Belgium | 1181.68 (1086.27–1260.96) | 15.21 (14.07–16.19) | 909.53 (797.59–1012.39) | 8.34 (7.54–9.18) | -2.01 (-2.12 to -1.89) |
| Belize | 1.50 (1.28–1.72) | 2.83 (2.42–3.25) | 7.62 (6.73–8.64) | 4.22 (3.72–4.77) | 1.4 (1.05 to 1.75) |
| Benin | 21.84 (15.12–29.24) | 1.82 (1.28–2.43) | 95.42 (61.94–129.43) | 2.73 (1.81–3.66) | 1.2 (1.12 to 1.27) |
| Bermuda | 4.84 (3.95–5.87) | 13.82 (11.30–16.72) | 6.70 (5.49–8.52) | 11.08 (9.01–14.00) | -1.03 (-1.24 to -0.82) |
| Bhutan | 5.34 (3.27–8.41) | 3.54 (2.17–5.56) | 18.96 (12.15–34.05) | 5.82 (3.75–10.38) | 1.52 (1.45 to 1.59) |
| Bolivia (Plurinational State of) | 70.42 (48.95–130.60) | 3.55 (2.50–6.54) | 363.93 (233.54–518.35) | 6.93 (4.46–9.84) | 2.27 (2.1 to 2.45) |
| Bosnia and Herzegovina | 166.24 (137.04–196.82) | 6.83 (5.65–8.08) | 252.03 (175.41–327.32) | 8.35 (5.80–10.90) | 1.06 (0.89 to 1.23) |
| Botswana | 16.34 (10.09–22.99) | 4.47 (2.82–6.31) | 64.11 (31.83–93.13) | 6.64 (3.40–9.54) | 1.54 (1.36 to 1.73) |
| Brazil | 3096.60 (2976.81–3200.68) | 5.62 (5.39–5.81) | 8721.10 (8185.63–9177.51) | 6.47 (6.08–6.81) | 0.18 (0.07 to 0.29) |
| Brunei Darussalam | 6.91 (5.09–9.65) | 10.11 (7.68–13.61) | 24.67 (19.13–31.19) | 11.40 (8.86–14.10) | 0.69 (0.58 to 0.8) |
| Bulgaria | 557.54 (507.14–610.68) | 9.26 (8.42–10.25) | 791.19 (660.47–942.15) | 12.59 (10.30–15.28) | 0.93 (0.7 to 1.17) |
| Burkina Faso | 51.99 (29.03–69.36) | 1.99 (1.11–2.66) | 170.69 (107.00–234.52) | 2.83 (1.77–3.91) | 1.19 (1.1 to 1.28) |
| Burundi | 85.71 (44.26–135.27) | 5.74 (3.01–8.99) | 200.95 (119.67–273.66) | 6.30 (3.83–8.70) | 0.13 (0.02 to 0.23) |
| Cabo Verde | 1.13 (0.78–1.65) | 0.85 (0.58–1.25) | 8.24 (3.36–11.66) | 3.12 (1.26–4.48) | 4.48 (3.74 to 5.23) |
| Cambodia | 171.37 (100.53–325.56) | 5.10 (3.07–9.35) | 1010.26 (604.21–1550.69) | 12.40 (7.53–18.80) | 2.91 (2.87 to 2.96) |
| Cameroon | 64.12 (49.47–83.16) | 2.30 (1.79–3.00) | 298.30 (176.21–430.58) | 3.47 (2.09–4.91) | 1.28 (1.19 to 1.38) |
| Canada | 1737.60 (1616.58–1829.25) | 10.29 (9.57–10.85) | 2757.81 (2493.41–3013.14) | 8.22 (7.50–8.88) | -0.65 (-0.83 to -0.46) |
| Central African Republic | 21.22 (14.38–39.45) | 2.90 (1.96–5.02) | 55.38 (36.68–84.60) | 3.63 (2.40–5.43) | 0.72 (0.65 to 0.79) |
| Chad | 24.01 (12.24–34.52) | 1.48 (0.77–2.13) | 82.02 (47.53–116.96) | 2.33 (1.37–3.36) | 1.57 (1.52 to 1.62) |
| Chile | 338.75 (313.21–367.41) | 5.90 (5.46–6.41) | 880.45 (802.15–957.80) | 6.82 (6.23–7.42) | 0.36 (0 to 0.72) |
| China | 19997.60 (14086.43–26191.07) | 4.08 (2.97–5.31) | 41236.26 (30302.39–54548.52) | 4.05 (2.96–5.38) | -0.44 (-0.59 to -0.3) |
| Colombia | 762.27 (713.26–811.71) | 6.88 (6.47–7.29) | 2429.05 (2019.39–2902.07) | 8.30 (6.90–9.92) | 0.69 (0.55 to 0.83) |
| Comoros | 7.48 (4.15–10.81) | 5.97 (3.55–8.53) | 27.38 (15.01–42.55) | 9.03 (4.98–13.92) | 1.13 (1 to 1.26) |
| Congo | 24.73 (17.36–40.72) | 3.65 (2.58–5.81) | 105.91 (70.37–152.25) | 5.89 (4.01–8.27) | 1.55 (1.44 to 1.65) |
| Cook Islands | 0.14 (0.09–0.19) | 2.11 (1.42–2.89) | 0.38 (0.25–0.53) | 3.18 (2.10–4.45) | 1.36 (1.27 to 1.45) |
| Costa Rica | 37.48 (34.70–40.73) | 3.67 (3.40–4.00) | 188.05 (165.10–213.06) | 6.51 (5.71–7.36) | 1.62 (1.35 to 1.88) |
| Coted'Ivoire | 90.90 (64.66–118.23) | 3.76 (2.74–4.91) | 376.19 (238.85–531.26) | 5.37 (3.50–7.59) | 1.21 (1.14 to 1.29) |
| Croatia | 470.06 (425.13–506.41) | 13.80 (12.45–14.89) | 504.46 (428.76–583.11) | 12.26 (10.44–14.01) | -0.21 (-0.42 to 0) |
| Cuba | 217.77 (201.89–235.48) | 4.12 (3.81–4.46) | 583.37 (491.26–671.14) | 6.51 (5.48–7.49) | 0.84 (0.58 to 1.1) |
| Cyprus | 42.20 (32.49–58.16) | 9.89 (7.68–13.88) | 85.92 (61.54–113.27) | 8.30 (6.01–10.90) | -0.4 (-0.6 to -0.19) |
| Czechia | 893.67 (829.17–967.91) | 12.37 (11.49–13.27) | 1098.16 (934.24–1268.67) | 11.05 (9.44–12.84) | -0.25 (-0.55 to 0.05) |
| Democratic People's Republic of Korea | 535.91 (328.36–773.48) | 4.97 (3.08–7.18) | 1240.68 (823.21–1749.94) | 7.10 (4.65–10.01) | 1.24 (1.18 to 1.3) |
| Democratic Republic of the Congo | 283.91 (178.70–446.09) | 2.81 (1.77–4.38) | 1044.03 (551.53–1528.21) | 4.28 (2.25–6.22) | 1.39 (1.12 to 1.66) |
| Denmark | 461.68 (406.44–512.14) | 11.89 (10.53–13.14) | 537.63 (479.78–593.04) | 9.34 (8.44–10.26) | -1.44 (-1.95 to -0.92) |
| Djibouti | 5.10 (2.74–7.54) | 5.73 (3.14–8.29) | 30.03 (15.33–46.98) | 7.75 (4.12–11.80) | 0.95 (0.89 to 1.01) |
| Dominica | 1.58 (1.00–2.05) | 4.52 (2.96–5.93) | 2.12 (1.54–2.69) | 5.14 (3.76–6.55) | 0.56 (0.45 to 0.66) |
| Dominican Republic | 64.94 (52.01–82.56) | 2.73 (2.18–3.49) | 200.99 (152.68–254.07) | 3.73 (2.85–4.72) | 1.29 (1.16 to 1.41) |
| Ecuador | 29.93 (27.20–32.70) | 0.92 (0.84–1.01) | 589.25 (458.08–747.47) | 6.64 (5.16–8.40) | 6.64 (4.77 to 8.54) |
| Egypt | 286.13 (210.94–577.57) | 1.73 (1.25–3.80) | 1534.64 (1161.93–1968.10) | 4.34 (3.36–5.47) | 3.55 (3.01 to 4.09) |
| El Salvador | 65.00 (56.33–83.00) | 3.55 (3.07–4.66) | 244.57 (167.55–314.90) | 6.93 (4.74–8.91) | 2.33 (2.08 to 2.58) |
| Equatorial Guinea | 3.30 (2.04–5.89) | 2.66 (1.62–4.55) | 22.30 (11.54–36.55) | 5.67 (3.09–9.20) | 2.72 (2.57 to 2.87) |
| Eritrea | 44.04 (27.37–65.28) | 5.31 (3.40–7.73) | 163.59 (107.63–246.03) | 8.13 (5.33–11.96) | 1.34 (1.25 to 1.43) |
| Estonia | 130.59 (116.98–145.11) | 11.32 (10.17–12.52) | 113.62 (94.47–134.70) | 8.72 (7.37–10.29) | -0.98 (-1.72 to -0.24) |
| Eswatini | 11.48 (6.63–18.15) | 5.84 (3.43–9.32) | 33.37 (17.51–54.77) | 8.48 (4.67–13.69) | 1.2 (1.06 to 1.34) |
| Ethiopia | 591.13 (257.22–1140.77) | 5.12 (2.09–9.84) | 2054.11 (1034.24–2929.46) | 7.45 (3.73–10.60) | 1.13 (1.01 to 1.25) |
| Fiji | 9.24 (6.95–12.15) | 3.83 (2.89–5.00) | 20.35 (14.05–27.98) | 4.62 (3.20–6.26) | 0.48 (0.37 to 0.58) |
| Finland | 515.48 (479.67–548.57) | 13.40 (12.53–14.27) | 519.29 (453.92–574.84) | 9.17 (8.17–10.05) | -1.19 (-1.36 to -1.01) |
| France | 5288.63 (4864.06–5628.68) | 12.79 (11.85–13.57) | 5817.35 (5116.84–6471.18) | 8.92 (8.04–9.82) | -1.04 (-1.16 to -0.92) |
| Gabon | 13.30 (9.79–18.47) | 4.04 (2.95–5.65) | 39.41 (25.17–57.67) | 6.02 (3.87–8.69) | 1.17 (1.1 to 1.23) |
| Gambia | 3.46 (2.45–4.51) | 1.73 (1.24–2.24) | 18.39 (11.55–26.73) | 2.90 (1.85–4.13) | 1.38 (1.15 to 1.61) |
| Georgia | 104.22 (82.30–130.68) | 2.94 (2.31–3.68) | 397.99 (337.14–460.64) | 13.24 (11.26–15.30) | 6.02 (5.63 to 6.42) |
| Germany | 10593.94 (9650.99–11388.17) | 15.54 (14.21–16.69) | 8100.34 (7109.94–8912.53) | 9.13 (8.20–9.88) | -1.85 (-1.93 to -1.77) |
| Ghana | 90.43 (63.35–118.39) | 2.17 (1.52–2.86) | 456.66 (271.02–658.54) | 3.89 (2.30–5.69) | 1.89 (1.85 to 1.94) |
| Greece | 741.73 (692.19–784.82) | 9.88 (9.28–10.43) | 1004.39 (899.50–1095.04) | 9.58 (8.85–10.30) | -0.45 (-0.62 to -0.27) |
| Greenland | 3.56 (2.97–4.27) | 18.14 (15.17–21.83) | 4.34 (3.20–6.16) | 12.57 (9.39–17.28) | -1.33 (-1.56 to -1.1) |
| Grenada | 3.51 (2.71–4.63) | 9.40 (7.16–12.48) | 7.66 (6.61–8.74) | 13.07 (11.30–14.91) | 1.33 (1.2 to 1.45) |
| Guam | 2.18 (1.71–3.66) | 4.84 (3.85–8.04) | 7.13 (5.44–8.59) | 7.50 (5.71–8.97) | 2.44 (1.96 to 2.93) |
| Guatemala | 41.03 (38.62–43.52) | 1.71 (1.62–1.81) | 246.18 (207.88–287.37) | 3.65 (3.09–4.27) | 2.99 (2.59 to 3.4) |
| Guinea | 39.05 (29.33–50.12) | 2.13 (1.61–2.75) | 108.62 (60.71–155.97) | 3.06 (1.75–4.33) | 1.13 (1.1 to 1.15) |
| Guinea-Bissau | 5.50 (3.88–8.13) | 2.13 (1.54–3.14) | 19.00 (13.31–26.39) | 3.47 (2.41–4.76) | 1.63 (1.6 to 1.67) |
| Guyana | 19.37 (16.42–22.77) | 7.79 (6.73–9.18) | 44.76 (33.25–58.28) | 11.89 (8.84–15.40) | 1.62 (1.23 to 2.01) |
| Haiti | 108.03 (65.30–266.11) | 5.48 (3.32–12.68) | 352.01 (223.54–668.88) | 7.43 (4.75–13.64) | 1.07 (0.98 to 1.17) |
| Honduras | 81.73 (61.69–101.98) | 5.95 (4.68–7.48) | 405.88 (234.78–630.99) | 9.78 (5.93–15.44) | 1.49 (1.32 to 1.66) |
| Hungary | 913.71 (823.24–994.82) | 11.92 (10.78–12.98) | 917.34 (793.36–1045.54) | 9.83 (8.51–11.25) | -0.48 (-0.71 to -0.25) |
| Iceland | 20.92 (19.03–22.79) | 14.70 (13.38–15.99) | 23.79 (20.61–26.60) | 8.86 (7.75–9.89) | -1.7 (-1.88 to -1.51) |
| India | 9497.78 (6832.90–12690.63) | 3.50 (2.53–4.63) | 36777.16 (30565.31–43621.84) | 5.57 (4.65–6.61) | 1.38 (1.27 to 1.49) |
| Indonesia | 3972.85 (2716.45–7572.62) | 5.81 (4.08–10.85) | 13250.48 (8573.93–21564.96) | 9.06 (5.94–14.82) | 1.26 (1.12 to 1.4) |
| Iran (Islamic Republic of) | 358.16 (248.74–486.99) | 2.23 (1.64–3.04) | 1663.46 (1071.09–1932.89) | 3.82 (2.47–4.44) | 2.05 (1.9 to 2.19) |
| Iraq | 173.85 (123.47–258.68) | 3.59 (2.54–5.39) | 823.02 (563.57–1187.69) | 5.47 (3.85–7.71) | 1.48 (1.39 to 1.58) |
| Ireland | 332.00 (308.03–354.51) | 16.40 (15.24–17.53) | 393.78 (347.41–435.66) | 10.30 (9.19–11.38) | -1.37 (-1.54 to -1.2) |
| Israel | 299.65 (277.29–318.19) | 12.00 (11.10–12.77) | 456.94 (403.21–502.94) | 7.45 (6.67–8.18) | -1.52 (-1.69 to -1.35) |
| Italy | 4469.47 (4223.45–4678.70) | 10.35 (9.84–10.82) | 5485.78 (4841.52–5905.49) | 8.78 (8.08–9.30) | -0.54 (-0.69 to -0.4) |
| Jamaica | 64.80 (56.48–73.56) | 6.89 (6.02–7.77) | 137.26 (104.48–178.95) | 8.68 (6.58–11.31) | 0.69 (0.48 to 0.9) |
| Japan | 5955.86 (5674.44–6177.62) | 6.84 (6.54–7.09) | 8639.01 (7471.89–9348.18) | 6.82 (6.30–7.19) | -0.01 (-0.19 to 0.17) |
| Jordan | 32.52 (21.07–44.54) | 3.84 (2.44–5.23) | 216.18 (133.63–293.17) | 5.01 (3.11–6.71) | 0.73 (0.43 to 1.02) |
| Kazakhstan | 539.87 (454.79–653.80) | 6.86 (5.77–8.33) | 835.92 (681.03–1005.95) | 7.74 (6.30–9.30) | 0.14 (-0.14 to 0.41) |
| Kenya | 195.57 (80.08–275.09) | 3.80 (1.55–5.31) | 985.24 (602.85–1382.10) | 6.42 (4.01–8.90) | 1.82 (1.74 to 1.9) |
| Kiribati | 0.23 (0.14–0.30) | 0.90 (0.57–1.20) | 0.78 (0.40–1.14) | 1.56 (0.83–2.26) | 1.76 (1.57 to 1.94) |
| Kuwait | 17.62 (16.00–19.28) | 5.70 (5.17–6.23) | 83.47 (69.76–100.34) | 4.28 (3.60–5.10) | -1.13 (-1.45 to -0.81) |
| Kyrgyzstan | 79.41 (66.50–95.68) | 4.44 (3.70–5.35) | 267.61 (211.93–333.05) | 8.65 (6.75–10.73) | 3.49 (2.82 to 4.17) |
| Lao People's Democratic Republic | 66.71 (35.66–158.40) | 4.99 (2.79–11.40) | 318.77 (192.37–529.65) | 10.31 (6.35–16.94) | 2.51 (2.41 to 2.61) |
| Latvia | 172.92 (154.80–193.02) | 8.41 (7.54–9.36) | 213.95 (182.41–246.57) | 11.03 (9.29–12.88) | 0.67 (0.31 to 1.04) |
| Lebanon | 68.30 (49.07–106.71) | 5.67 (4.10–8.79) | 226.33 (150.53–293.73) | 7.09 (4.70–9.27) | 0.9 (0.7 to 1.09) |
| Lesotho | 23.08 (15.56–33.90) | 4.05 (2.72–5.96) | 53.15 (31.72–96.69) | 7.42 (4.47–13.54) | 2.31 (2.1 to 2.52) |
| Liberia | 11.72 (8.65–16.58) | 1.93 (1.44–2.67) | 47.76 (29.68–67.46) | 3.36 (2.13–4.76) | 2.02 (1.9 to 2.14) |
| Libya | 54.55 (36.10–74.67) | 5.40 (3.50–7.44) | 265.54 (183.09–362.93) | 8.47 (5.85–11.40) | 1.57 (1.39 to 1.74) |
| Lithuania | 258.27 (233.91–281.90) | 10.21 (9.24–11.16) | 297.89 (249.90–343.76) | 10.54 (8.90–12.18) | -0.5 (-0.97 to -0.03) |
| Luxembourg | 47.92 (44.82–51.32) | 16.59 (15.52–17.79) | 50.52 (45.03–56.06) | 9.74 (8.75–10.83) | -1.47 (-1.63 to -1.31) |
| Madagascar | 163.17 (106.91–221.69) | 5.27 (3.50–7.10) | 521.72 (322.05–757.37) | 6.28 (3.97–9.16) | 0.51 (0.34 to 0.69) |
| Malawi | 84.23 (57.07–112.13) | 3.36 (2.32–4.43) | 279.47 (123.74–438.90) | 5.24 (2.40–8.03) | 1.46 (1.37 to 1.55) |
| Malaysia | 307.54 (239.89–509.84) | 5.37 (4.21–8.42) | 1231.74 (962.12–1842.01) | 8.03 (6.28–11.86) | 1.6 (1.21 to 1.99) |
| Maldives | 3.51 (1.95–9.73) | 6.49 (3.76–16.78) | 17.66 (12.28–24.97) | 9.24 (6.58–12.44) | 0.86 (0.56 to 1.17) |
| Mali | 29.98 (21.74–37.13) | 1.26 (0.92–1.56) | 93.56 (55.48–128.01) | 1.66 (1.00–2.24) | 0.86 (0.83 to 0.89) |
| Malta | 31.13 (28.29–33.59) | 13.53 (12.28–14.57) | 47.16 (41.47–53.35) | 11.08 (9.80–12.52) | -0.84 (-0.99 to -0.68) |
| Marshall Islands | 0.33 (0.22–0.52) | 3.20 (2.18–5.01) | 1.34 (0.68–2.30) | 6.10 (3.11–10.05) | 2.09 (1.95 to 2.22) |
| Mauritania | 11.70 (8.92–16.02) | 2.03 (1.53–2.78) | 44.13 (24.29–63.68) | 3.35 (1.86–4.84) | 1.47 (1.39 to 1.55) |
| Mauritius | 37.24 (34.56–40.24) | 7.92 (7.34–8.54) | 123.32 (112.08–132.94) | 14.15 (12.79–15.22) | 1.58 (1.17 to 2) |
| Mexico | 1670.70 (1629.92–1713.65) | 6.15 (5.98–6.31) | 6474.64 (5437.94–7597.45) | 9.11 (7.66–10.67) | 1.26 (1.21 to 1.32) |
| Micronesia (Federated States of) | 1.00 (0.60–1.59) | 3.51 (2.13–5.51) | 2.76 (1.38–4.26) | 6.25 (3.17–9.50) | 1.89 (1.78 to 2) |
| Monaco | 3.36 (2.13–5.32) | 11.17 (7.12–17.29) | 3.88 (2.55–6.51) | 9.63 (6.27–15.98) | -0.62 (-0.68 to -0.56) |
| Mongolia | 33.94 (23.19–47.95) | 5.19 (3.58–7.29) | 100.82 (71.84–133.09) | 6.50 (4.59–8.55) | 0.7 (0.58 to 0.82) |
| Montenegro | 27.77 (20.71–35.79) | 8.07 (6.02–10.44) | 39.02 (27.80–52.61) | 8.01 (5.69–10.71) | 0.21 (-0.08 to 0.49) |
| Morocco | 223.90 (149.67–289.85) | 2.81 (1.86–3.65) | 851.13 (536.50–1197.18) | 4.55 (2.86–6.31) | 1.64 (1.61 to 1.68) |
| Mozambique | 201.86 (114.51–290.22) | 5.28 (3.10–7.39) | 617.26 (367.13–904.67) | 7.53 (4.58–10.81) | 1.2 (1.1 to 1.3) |
| Myanmar | 1035.04 (655.28–1891.03) | 6.78 (4.38–11.91) | 2970.23 (2037.31–4333.62) | 9.91 (6.86–14.49) | 1.05 (0.95 to 1.14) |
| Namibia | 14.94 (10.90–19.29) | 3.71 (2.73–4.77) | 47.99 (28.93–73.62) | 5.26 (3.26–7.87) | 0.86 (0.72 to 1) |
| Nauru | 0.11 (0.06–0.19) | 3.92 (2.37–6.84) | 0.25 (0.11–0.45) | 6.18 (2.94–10.89) | 1.53 (1.5 to 1.56) |
| Nepal | 186.16 (102.14–296.64) | 3.40 (1.90–5.34) | 750.75 (502.61–1301.29) | 5.41 (3.66–9.35) | 1.46 (1.42 to 1.51) |
| Netherlands | 1396.45 (1289.06–1480.60) | 13.63 (12.65–14.39) | 1416.71 (1252.50–1560.52) | 8.56 (7.74–9.33) | -1.77 (-1.91 to -1.63) |
| New Zealand | 274.22 (254.85–293.21) | 13.64 (12.70–14.65) | 282.11 (250.12–314.27) | 7.10 (6.37–7.86) | -2.16 (-2.35 to -1.97) |
| Nicaragua | 26.03 (20.75–34.84) | 2.36 (1.87–3.25) | 125.38 (91.23–158.13) | 4.14 (3.02–5.20) | 2.04 (1.74 to 2.35) |
| Niger | 23.93 (15.93–35.15) | 1.41 (0.95–2.07) | 108.44 (68.32–160.16) | 1.99 (1.28–2.89) | 1.13 (1.09 to 1.18) |
| Nigeria | 561.55 (330.48–800.18) | 2.43 (1.43–3.45) | 2480.53 (1398.93–3641.61) | 4.04 (2.33–5.86) | 1.75 (1.61 to 1.89) |
| Niue | 0.05 (0.03–0.06) | 4.05 (2.75–5.38) | 0.08 (0.04–0.11) | 7.50 (4.15–10.56) | 1.58 (1.45 to 1.71) |
| North Macedonia | 89.18 (73.08–111.65) | 8.69 (7.15–10.83) | 164.28 (117.55–217.72) | 10.05 (7.20–13.27) | 0.48 (0.24 to 0.71) |
| Northern Mariana Islands | 0.50 (0.32–0.94) | 4.08 (2.76–7.50) | 2.16 (1.68–2.60) | 8.10 (6.22–9.58) | 2.82 (2.43 to 3.22) |
| Norway | 465.00 (437.18–487.94) | 14.72 (13.96–15.45) | 463.61 (416.90–499.03) | 9.77 (8.96–10.45) | -1.38 (-1.64 to -1.13) |
| Oman | 7.06 (3.07–11.08) | 2.03 (0.88–3.21) | 28.45 (19.33–37.51) | 2.55 (1.77–3.39) | 0.68 (0.31 to 1.06) |
| Pakistan | 1929.67 (1308.29–2389.19) | 6.46 (4.38–8.09) | 8217.65 (4850.47–12141.85) | 10.74 (6.50–15.78) | 1.45 (1.31 to 1.6) |
| Palau | 0.07 (0.04–0.09) | 1.14 (0.77–1.57) | 0.15 (0.11–0.20) | 1.50 (1.09–1.92) | 0.83 (0.74 to 0.93) |
| Palestine | 19.82 (12.85–29.87) | 3.64 (2.35–5.43) | 86.25 (62.14–107.57) | 5.38 (3.88–6.69) | 1.41 (1.34 to 1.47) |
| Panama | 27.85 (25.65–30.40) | 3.13 (2.88–3.40) | 146.23 (119.19–173.90) | 6.54 (5.33–7.78) | 2.46 (2.12 to 2.81) |
| Papua New Guinea | 26.69 (13.67–43.25) | 2.36 (1.29–3.72) | 118.62 (58.53–184.72) | 3.51 (1.80–5.24) | 1.19 (1.08 to 1.3) |
| Paraguay | 43.50 (33.59–59.96) | 3.26 (2.51–4.61) | 169.98 (116.45–231.69) | 5.24 (3.60–7.16) | 1.48 (1.24 to 1.71) |
| Peru | 355.83 (274.06–460.00) | 4.90 (3.81–6.30) | 1279.99 (891.22–1708.30) | 7.03 (4.90–9.37) | 1.08 (0.92 to 1.25) |
| Philippines | 1765.79 (1328.76–2089.68) | 8.35 (6.16–9.85) | 6490.86 (4658.33–8328.90) | 12.58 (9.21–16.01) | 1.35 (1.32 to 1.38) |
| Poland | 3063.26 (2943.42–3173.42) | 13.10 (12.60–13.57) | 4301.87 (3831.67–4746.45) | 12.15 (10.80–13.47) | -0.25 (-0.43 to -0.07) |
| Portugal | 476.34 (444.88–504.66) | 6.80 (6.36–7.23) | 549.33 (480.98–603.44) | 4.89 (4.42–5.31) | -1.23 (-1.41 to -1.05) |
| Puerto Rico | 72.25 (66.42–78.04) | 3.74 (3.44–4.04) | 201.96 (165.62–236.66) | 6.80 (5.59–8.03) | 1.93 (1.29 to 2.56) |
| Qatar | 4.93 (3.50–6.64) | 8.25 (5.94–11.09) | 43.31 (27.33–62.92) | 9.16 (6.04–12.23) | 0.71 (0.5 to 0.91) |
| Republic of Korea | 726.26 (634.00–905.48) | 3.59 (3.18–4.71) | 2309.24 (1498.31–2721.15) | 5.34 (3.58–6.28) | 1.13 (0.95 to 1.3) |
| Republic of Moldova | 213.31 (197.29–227.30) | 8.23 (7.62–8.77) | 176.54 (152.13–200.65) | 5.66 (4.88–6.44) | -0.94 (-1.31 to -0.57) |
| Romania | 1270.80 (1179.99–1348.95) | 8.86 (8.23–9.40) | 1732.98 (1484.45–1972.14) | 10.03 (8.55–11.44) | 0.4 (0.29 to 0.52) |
| Russian Federation | 11864.67 (11498.29–12136.04) | 11.41 (11.05–11.67) | 13088.33 (11650.05–14496.00) | 10.32 (9.19–11.44) | -0.39 (-0.54 to -0.23) |
| Rwanda | 132.41 (69.77–218.49) | 6.89 (3.72–11.21) | 412.87 (255.01–598.93) | 9.21 (5.79–13.20) | 0.88 (0.77 to 0.99) |
| Saint Kitts and Nevis | 1.82 (1.38–2.34) | 9.50 (7.19–12.19) | 3.37 (2.69–4.09) | 9.07 (7.34–10.91) | 0.01 (-0.12 to 0.15) |
| Saint Lucia | 4.69 (3.96–5.81) | 9.35 (7.90–11.60) | 12.56 (10.19–15.16) | 10.47 (8.48–12.66) | 0.13 (0.02 to 0.25) |
| Saint Vincent and the Grenadines | 3.52 (3.12–4.23) | 8.65 (7.70–10.39) | 6.78 (5.82–7.85) | 10.15 (8.75–11.79) | 0.43 (0.27 to 0.59) |
| Samoa | 2.37 (1.78–3.14) | 4.94 (3.76–6.44) | 5.65 (3.73–7.83) | 7.14 (4.75–9.86) | 1.13 (1.05 to 1.22) |
| San Marino | 1.23 (0.94–1.62) | 6.98 (5.32–9.31) | 1.29 (0.77–1.89) | 4.02 (2.38–6.00) | -1.02 (-1.29 to -0.76) |
| Sao Tome and Principe | 1.33 (0.93–1.67) | 3.60 (2.61–4.52) | 4.54 (2.61–6.96) | 6.18 (3.71–9.28) | 1.69 (1.57 to 1.81) |
| Saudi Arabia | 97.03 (66.01–160.91) | 3.16 (2.13–4.99) | 597.43 (408.89–955.41) | 4.87 (3.43–7.56) | 1.33 (1.11 to 1.55) |
| Senegal | 37.21 (25.75–48.24) | 1.92 (1.36–2.51) | 165.60 (97.40–241.75) | 3.37 (1.98–4.94) | 1.92 (1.8 to 2.03) |
| Serbia | 530.81 (427.75–664.11) | 8.89 (7.11–11.16) | 777.17 (543.11–968.40) | 10.05 (7.09–12.57) | 0.38 (0.29 to 0.47) |
| Seychelles | 3.67 (3.01–4.81) | 11.70 (9.52–15.33) | 10.24 (7.69–12.47) | 17.51 (13.07–21.19) | 1.57 (1.37 to 1.77) |
| Sierra Leone | 18.31 (11.11–25.07) | 1.63 (1.01–2.18) | 66.25 (41.03–92.01) | 2.75 (1.73–3.78) | 1.84 (1.77 to 1.91) |
| Singapore | 109.10 (102.20–116.16) | 7.84 (7.35–8.33) | 254.73 (231.93–277.35) | 6.30 (5.73–6.82) | -0.66 (-0.86 to -0.45) |
| Slovakia | 355.98 (278.28–416.99) | 11.10 (8.66–12.98) | 480.00 (346.48–606.00) | 10.18 (7.43–12.84) | -0.26 (-0.38 to -0.13) |
| Slovenia | 135.59 (121.95–149.32) | 10.01 (8.98–10.99) | 148.94 (124.77–174.44) | 7.30 (6.10–8.73) | -0.8 (-1.03 to -0.56) |
| Solomon Islands | 1.59 (0.54–2.75) | 2.04 (0.71–3.42) | 10.10 (5.33–16.13) | 4.38 (2.37–6.92) | 2.59 (2.5 to 2.68) |
| Somalia | 74.49 (39.92–139.99) | 4.44 (2.45–8.17) | 244.73 (153.66–403.20) | 5.29 (3.38–8.50) | 0.59 (0.57 to 0.61) |
| South Africa | 660.88 (549.97–811.24) | 4.94 (3.96–6.18) | 2071.76 (1633.69–2404.24) | 7.36 (5.77–8.54) | 1.47 (1.36 to 1.59) |
| South Sudan | 65.00 (42.14–98.50) | 5.13 (3.39–7.69) | 157.36 (102.51–234.10) | 6.27 (4.18–9.18) | 0.62 (0.48 to 0.76) |
| Spain | 2852.21 (2613.17–3059.76) | 10.76 (9.86–11.52) | 3638.78 (3156.55–4110.04) | 8.23 (7.36–9.13) | -1 (-1.13 to -0.88) |
| Sri Lanka | 342.08 (281.63–441.33) | 4.99 (4.13–6.28) | 1035.64 (630.76–1457.03) | 7.32 (4.48–10.25) | 1.49 (1.34 to 1.64) |
| Sudan | 103.05 (27.49–225.58) | 1.91 (0.48–4.15) | 388.97 (218.42–636.49) | 2.99 (1.81–4.92) | 1.54 (1.4 to 1.69) |
| Suriname | 11.84 (9.68–14.38) | 7.99 (6.66–9.72) | 30.17 (23.59–39.01) | 8.98 (6.99–11.59) | 0.6 (0.47 to 0.72) |
| Sweden | 1032.49 (971.91–1085.08) | 15.24 (14.42–16.03) | 761.52 (652.86–871.17) | 7.89 (6.83–9.04) | -2.17 (-2.42 to -1.93) |
| Switzerland | 454.19 (401.50–500.78) | 8.84 (7.86–9.66) | 585.40 (500.71–670.15) | 6.67 (5.82–7.54) | -1.24 (-1.68 to -0.79) |
| Syrian Arab Republic | 74.31 (50.76–105.91) | 2.32 (1.61–3.26) | 235.17 (156.72–338.45) | 3.23 (2.17–4.60) | 0.9 (0.78 to 1.03) |
| Taiwan (Province of China) | 531.92 (486.23–576.75) | 6.00 (5.49–6.49) | 1762.96 (1543.04–1958.68) | 9.46 (8.26–10.46) | 1.14 (0.87 to 1.42) |
| Tajikistan | 38.93 (27.88–57.02) | 2.35 (1.68–3.38) | 98.09 (68.58–131.42) | 2.52 (1.78–3.33) | 0.08 (-0.01 to 0.16) |
| Thailand | 1565.80 (1090.05–1947.69) | 6.70 (4.66–8.28) | 5387.50 (3229.66–7362.21) | 10.81 (6.18–14.87) | 1.38 (1.21 to 1.54) |
| Timor-Leste | 7.85 (4.28–14.36) | 3.83 (2.10–6.86) | 38.75 (23.83–53.88) | 7.68 (4.83–10.76) | 2.46 (2.22 to 2.7) |
| Togo | 17.37 (11.84–22.89) | 2.01 (1.39–2.63) | 88.11 (51.09–129.00) | 3.22 (1.89–4.68) | 1.45 (1.39 to 1.51) |
| Tokelau | 0.03 (0.02–0.04) | 3.75 (2.44–5.27) | 0.05 (0.03–0.07) | 6.90 (3.74–9.73) | 1.7 (1.57 to 1.82) |
| Tonga | 0.87 (0.41–1.17) | 2.75 (1.28–3.68) | 1.93 (0.98–2.82) | 4.34 (2.20–6.29) | 1.45 (1.33 to 1.57) |
| Trinidad and Tobago | 50.08 (45.53–58.71) | 10.56 (9.52–12.45) | 102.30 (77.92–129.63) | 11.08 (8.38–14.11) | 0.04 (-0.12 to 0.2) |
| Tunisia | 101.79 (76.53–130.55) | 3.73 (2.73–4.82) | 361.68 (242.13–518.51) | 5.16 (3.46–7.38) | 0.95 (0.89 to 1.01) |
| Turkey | 1429.42 (968.22–2287.13) | 6.91 (4.74–10.74) | 3654.54 (2550.84–4706.66) | 7.38 (5.14–9.47) | 0.19 (0.06 to 0.33) |
| Turkmenistan | 40.55 (35.97–45.29) | 3.24 (2.88–3.60) | 158.90 (119.45–214.56) | 6.39 (4.82–8.62) | 3.66 (1.57 to 5.79) |
| Tuvalu | 0.12 (0.07–0.20) | 2.88 (1.72–4.85) | 0.30 (0.17–0.45) | 5.45 (3.10–8.20) | 2.03 (1.86 to 2.21) |
| Uganda | 231.47 (158.75–318.27) | 5.97 (4.21–8.16) | 1083.05 (668.22–1567.75) | 9.99 (6.30–14.15) | 1.15 (0.92 to 1.38) |
| Ukraine | 3231.16 (2744.34–3776.32) | 8.18 (6.96–9.56) | 3461.48 (2219.13–4995.93) | 8.93 (5.58–13.05) | 0.27 (-0.01 to 0.54) |
| United Arab Emirates | 30.89 (20.08–53.63) | 12.75 (8.30–23.02) | 249.82 (185.84–357.00) | 25.40 (20.03–32.42) | 3.28 (2.86 to 3.71) |
| United Kingdom | 7370.45 (7085.93–7535.04) | 16.99 (16.50–17.30) | 6678.60 (6126.23–6968.43) | 11.09 (10.39–11.47) | -1.41 (-1.56 to -1.25) |
| United Republic of Tanzania | 409.90 (249.61–548.67) | 6.08 (3.74–7.97) | 1396.92 (884.89–1926.51) | 8.20 (5.40–11.05) | 0.96 (0.88 to 1.04) |
| United States Virgin Islands | 4.50 (3.48–6.54) | 8.88 (6.92–12.73) | 6.77 (4.69–9.39) | 9.35 (6.35–13.19) | 0.71 (0.33 to 1.1) |
| United States of America | 22244.19 (21008.46–22925.96) | 13.38 (12.78–13.74) | 25213.48 (23096.45–26469.97) | 8.96 (8.37–9.34) | -1.39 (-1.57 to -1.21) |
| Uruguay | 189.96 (170.34–210.84) | 9.54 (8.52–10.57) | 259.67 (234.66–285.55) | 9.84 (8.92–10.76) | 0.02 (-0.08 to 0.12) |
| Uzbekistan | 187.93 (145.88–234.17) | 2.65 (2.06–3.32) | 708.61 (540.67–898.29) | 4.24 (3.25–5.34) | 1.28 (0.96 to 1.6) |
| Vanuatu | 0.65 (0.27–1.26) | 1.74 (0.73–3.34) | 3.51 (1.74–6.13) | 3.18 (1.62–5.47) | 1.82 (1.72 to 1.93) |
| Venezuela (Bolivarian Republic of) | 138.03 (130.07–146.98) | 2.10 (1.98–2.24) | 1169.17 (859.76–1538.46) | 7.35 (5.38–9.70) | 3.49 (2.38 to 4.61) |
| Viet Nam | 752.56 (553.07–973.51) | 3.05 (2.20–3.96) | 3097.66 (2005.51–4218.41) | 5.37 (3.49–7.25) | 1.79 (1.7 to 1.88) |
| Yemen | 39.90 (5.60–86.02) | 1.37 (0.18–2.95) | 229.21 (108.00–383.91) | 2.48 (1.14–4.06) | 2.19 (2.04 to 2.33) |
| Zambia | 114.56 (63.86–158.06) | 6.26 (3.54–8.42) | 433.35 (250.88–680.98) | 8.56 (5.15–13.01) | 0.9 (0.74 to 1.07) |
| Zimbabwe | 139.45 (104.56–181.25) | 5.75 (4.31–7.51) | 505.21 (315.77–697.24) | 10.25 (6.52–14.03) | 2.2 (1.73 to 2.67) |

**Abbreviations**: ASR, age-standardized rate; OC, ovarian cancer; EAPC, estimated annual percentage change; UIs, uncertainty intervals; CI, conﬁdence interval.

| **Table S2** Global and regional prevalence of OC in 1990 and 2021, and EAPC of ASR from 1990 to 2021 | | | | | |
| --- | --- | --- | --- | --- | --- |
| **Location** | **1990** | | **2021** | | **EAPC (95% CI) 1990-2021** |
| **Number (95% UIs)** | **ASR (95% UIs)** | **Number (95% UIs)** | **ASR (95% UIs)** |
| Afghanistan | 326.35 (137.68–859.02) | 8.45 (3.50–21.82) | 1353.26 (739.01–3280.65) | 14.71 (7.68–34.43) | 1.97 (1.73 to 2.22) |
| Albania | 150.23 (115.25–196.64) | 11.68 (9.12–15.03) | 256.84 (176.06–359.50) | 14.03 (9.54–19.23) | 1.2 (0.89 to 1.5) |
| Algeria | 550.73 (394.31–721.06) | 6.94 (4.95–8.98) | 2218.54 (1597.87–3008.62) | 10.46 (7.55–14.16) | 1.3 (1.25 to 1.35) |
| American Samoa | 2.42 (1.46–3.30) | 14.74 (9.07–19.72) | 7.22 (3.69–10.85) | 28.47 (14.44–43.24) | 2.18 (2.06 to 2.3) |
| Andorra | 4.99 (3.15–7.57) | 17.35 (10.96–26.58) | 8.92 (5.77–12.34) | 13.49 (8.66–18.57) | -0.55 (-0.75 to -0.34) |
| Angola | 212.10 (111.00–351.02) | 7.31 (3.80–11.67) | 1500.31 (783.71–2282.44) | 14.70 (7.62–22.15) | 2.59 (2.42 to 2.77) |
| Antigua and Barbuda | 8.38 (7.53–9.37) | 29.33 (26.19–32.85) | 22.89 (21.02–24.89) | 39.99 (36.74–43.56) | 1.32 (1.17 to 1.46) |
| Argentina | 5942.03 (5355.32–6647.81) | 34.91 (31.42–39.08) | 8609.08 (7817.61–9388.17) | 31.77 (28.80–34.56) | -0.06 (-0.23 to 0.11) |
| Armenia | 354.67 (279.85–468.15) | 21.54 (17.16–28.27) | 581.59 (478.81–705.92) | 27.02 (22.25–32.81) | 1.13 (0.89 to 1.37) |
| Australia | 6255.04 (5774.44–6706.70) | 64.67 (59.30–69.21) | 6145.79 (5584.77–6696.13) | 32.52 (29.83–35.29) | -2.05 (-2.49 to -1.6) |
| Austria | 3597.63 (3373.70–3819.90) | 65.36 (61.44–69.39) | 2729.18 (2490.91–2992.33) | 36.92 (33.66–40.24) | -1.55 (-1.68 to -1.42) |
| Azerbaijan | 408.92 (265.58–590.18) | 12.68 (8.33–18.36) | 1062.49 (657.30–1623.75) | 16.85 (10.45–25.76) | 1.37 (1.04 to 1.71) |
| Bahamas | 50.79 (43.12–61.41) | 45.35 (38.80–54.50) | 133.33 (104.12–167.76) | 56.83 (44.45–71.66) | 0.91 (0.79 to 1.03) |
| Bahrain | 42.60 (32.23–55.46) | 32.56 (24.62–42.74) | 235.91 (159.34–313.71) | 43.68 (29.44–57.58) | 0.82 (0.74 to 0.89) |
| Bangladesh | 3314.07 (2164.09–4938.85) | 10.85 (7.03–16.24) | 16200.29 (9177.79–28285.26) | 19.94 (11.49–34.96) | 1.91 (1.86 to 1.95) |
| Barbados | 53.95 (48.63–60.12) | 38.92 (34.74–43.57) | 91.69 (72.12–116.70) | 42.47 (33.23–54.46) | 0.57 (0.45 to 0.7) |
| Belarus | 1748.37 (1569.53–1951.42) | 25.25 (22.67–28.35) | 2407.66 (1884.51–3002.68) | 32.21 (24.98–40.40) | 0.62 (0.13 to 1.11) |
| Belgium | 4268.88 (3956.00–4563.52) | 61.98 (57.45–66.20) | 3212.34 (2890.97–3522.53) | 35.57 (32.33–38.79) | -1.88 (-2 to -1.75) |
| Belize | 6.26 (5.25–7.29) | 10.78 (9.07–12.55) | 33.61 (29.43–38.47) | 16.99 (14.91–19.34) | 1.6 (1.27 to 1.92) |
| Benin | 76.63 (51.85–101.66) | 5.64 (3.90–7.50) | 379.53 (240.94–524.24) | 9.19 (5.93–12.50) | 1.41 (1.32 to 1.5) |
| Bermuda | 18.73 (15.18–22.88) | 53.54 (43.49–65.35) | 25.12 (20.43–31.93) | 50.34 (40.95–63.35) | -0.45 (-0.62 to -0.27) |
| Bhutan | 19.63 (11.99–31.66) | 11.12 (6.90–17.75) | 75.47 (46.99–138.86) | 21.69 (13.61–39.52) | 2.11 (2.02 to 2.2) |
| Bolivia (Plurinational State of) | 254.72 (173.57–469.08) | 11.32 (7.73–20.81) | 1434.02 (925.76–2062.73) | 25.68 (16.56–36.64) | 2.79 (2.58 to 3) |
| Bosnia and Herzegovina | 644.73 (523.75–757.38) | 26.03 (21.14–30.69) | 876.93 (603.09–1160.55) | 32.84 (22.69–43.67) | 1.21 (0.98 to 1.44) |
| Botswana | 60.70 (35.50–87.40) | 14.33 (8.74–20.34) | 245.19 (115.83–365.64) | 22.46 (10.90–33.07) | 1.76 (1.51 to 2.02) |
| Brazil | 12454.77 (12003.81–12875.12) | 20.40 (19.67–21.08) | 35068.89 (33127.63–36857.08) | 26.58 (25.11–27.95) | 0.57 (0.47 to 0.67) |
| Brunei Darussalam | 29.47 (20.82–42.70) | 36.30 (26.98–50.58) | 111.49 (85.03–142.87) | 47.90 (36.95–60.41) | 1.21 (1.08 to 1.34) |
| Bulgaria | 2209.59 (1998.17–2450.59) | 38.72 (35.01–42.97) | 2843.13 (2329.12–3473.69) | 52.75 (42.77–64.75) | 0.98 (0.78 to 1.18) |
| Burkina Faso | 179.85 (100.94–238.54) | 6.13 (3.44–8.25) | 664.23 (418.48–913.98) | 9.33 (5.88–13.05) | 1.45 (1.36 to 1.54) |
| Burundi | 295.14 (147.82–461.42) | 17.30 (8.83–27.16) | 817.43 (479.58–1109.02) | 20.89 (12.38–28.68) | 0.56 (0.44 to 0.68) |
| Cabo Verde | 4.49 (3.15–6.30) | 3.25 (2.24–4.67) | 33.71 (14.07–47.35) | 12.31 (5.07–17.17) | 4.38 (3.68 to 5.08) |
| Cambodia | 732.48 (414.83–1465.74) | 19.28 (11.14–37.26) | 4760.60 (2791.49–7453.90) | 55.96 (33.17–87.60) | 3.52 (3.46 to 3.58) |
| Cameroon | 235.27 (178.84–307.71) | 7.34 (5.67–9.59) | 1226.28 (711.05–1785.66) | 11.92 (7.05–17.31) | 1.5 (1.34 to 1.65) |
| Canada | 7172.11 (6710.04–7577.06) | 44.47 (41.70–47.00) | 10821.27 (9868.37–11721.29) | 36.92 (34.03–39.71) | -0.55 (-0.75 to -0.35) |
| Central African Republic | 70.11 (47.28–136.64) | 8.28 (5.64–15.54) | 197.07 (128.23–306.94) | 10.88 (7.25–16.77) | 0.89 (0.77 to 1) |
| Chad | 79.74 (39.57–114.64) | 4.45 (2.24–6.39) | 313.07 (178.94–463.35) | 7.28 (4.19–10.47) | 1.69 (1.65 to 1.73) |
| Chile | 1234.54 (1132.97–1343.58) | 20.77 (19.07–22.62) | 3623.54 (3300.53–3958.73) | 29.88 (27.19–32.65) | 1.06 (0.63 to 1.48) |
| China | 82574.27 (54339.09–109791.73) | 15.64 (10.62–20.74) | 178169.56 (128935.39–236918.25) | 18.67 (13.57–24.92) | 0.27 (0.16 to 0.39) |
| Colombia | 3189.81 (2964.93–3421.12) | 25.43 (23.82–27.10) | 10422.60 (8566.13–12437.44) | 36.43 (29.94–43.42) | 1.35 (1.23 to 1.48) |
| Comoros | 27.86 (13.92–40.81) | 19.28 (10.57–27.93) | 105.55 (55.42–166.22) | 32.00 (17.13–50.11) | 1.33 (1.12 to 1.53) |
| Congo | 82.91 (56.18–141.89) | 10.93 (7.51–18.24) | 424.63 (274.00–618.06) | 20.29 (13.38–28.89) | 2.05 (1.92 to 2.17) |
| Cook Islands | 0.62 (0.42–0.87) | 8.51 (5.73–11.82) | 1.67 (1.11–2.35) | 15.03 (9.81–21.12) | 1.87 (1.8 to 1.95) |
| Costa Rica | 159.27 (146.79–172.96) | 14.22 (13.14–15.48) | 833.26 (728.56–943.48) | 29.38 (25.58–33.19) | 2.14 (1.9 to 2.38) |
| Coted'Ivoire | 342.71 (242.17–452.24) | 11.42 (8.20–14.89) | 1534.16 (971.72–2187.52) | 18.07 (11.48–25.74) | 1.56 (1.44 to 1.69) |
| Croatia | 2104.45 (1913.06–2276.52) | 63.99 (58.00–69.20) | 2154.51 (1842.38–2477.88) | 60.70 (51.76–69.67) | 0 (-0.24 to 0.24) |
| Cuba | 872.61 (800.16–944.53) | 16.20 (14.85–17.55) | 2320.63 (1931.88–2689.84) | 28.71 (24.13–33.39) | 1.09 (0.79 to 1.38) |
| Cyprus | 154.09 (119.80–207.83) | 36.04 (28.28–48.60) | 345.35 (247.62–454.68) | 34.98 (25.18–46.35) | 0.1 (-0.19 to 0.38) |
| Czechia | 3472.43 (3217.01–3740.95) | 51.54 (47.71–55.55) | 4306.09 (3680.60–4983.04) | 49.97 (42.71–58.19) | 0.03 (-0.3 to 0.36) |
| Democratic People's Republic of Korea | 2366.61 (1421.31–3475.54) | 21.36 (12.90–31.39) | 5733.60 (3759.13–8210.31) | 34.40 (22.20–49.17) | 1.63 (1.56 to 1.69) |
| Democratic Republic of the Congo | 986.18 (621.66–1557.93) | 8.50 (5.35–13.26) | 3971.13 (2132.38–5826.10) | 14.10 (7.46–20.69) | 1.64 (1.31 to 1.98) |
| Denmark | 1525.39 (1352.06–1688.39) | 43.51 (38.89–48.04) | 1779.88 (1601.71–1957.17) | 35.82 (32.65–39.29) | -1.2 (-1.75 to -0.64) |
| Djibouti | 19.29 (10.02–29.02) | 17.79 (9.61–26.30) | 119.92 (59.01–190.45) | 26.16 (13.21–40.64) | 1.19 (1.12 to 1.26) |
| Dominica | 5.02 (3.39–6.51) | 14.90 (10.44–19.26) | 7.55 (5.55–9.79) | 19.37 (14.09–25.38) | 1 (0.92 to 1.08) |
| Dominican Republic | 278.32 (215.75–356.41) | 10.20 (8.10–12.99) | 824.02 (605.93–1061.32) | 14.94 (11.06–19.28) | 1.57 (1.43 to 1.72) |
| Ecuador | 120.20 (108.56–132.77) | 3.25 (2.94–3.56) | 2445.84 (1872.40–3141.56) | 27.01 (20.76–34.65) | 7.17 (5.22 to 9.15) |
| Egypt | 1152.19 (864.01–2119.78) | 5.88 (4.34–11.70) | 6525.28 (4888.19–8373.15) | 15.75 (11.92–20.20) | 3.57 (3.12 to 4.02) |
| El Salvador | 262.95 (227.61–322.28) | 13.11 (11.40–16.41) | 1050.27 (705.44–1358.38) | 29.83 (20.05–38.51) | 2.87 (2.56 to 3.18) |
| Equatorial Guinea | 11.01 (6.63–19.74) | 7.89 (4.83–14.11) | 98.00 (49.33–165.32) | 20.84 (10.79–34.26) | 3.48 (3.31 to 3.65) |
| Eritrea | 152.74 (94.04–226.64) | 15.43 (9.60–22.91) | 616.79 (395.16–932.29) | 26.30 (17.35–39.51) | 1.63 (1.54 to 1.72) |
| Estonia | 465.17 (419.54–513.69) | 44.42 (39.94–49.30) | 384.41 (323.94–455.74) | 36.42 (30.70–42.70) | -0.87 (-1.57 to -0.17) |
| Eswatini | 43.28 (25.12–67.01) | 18.39 (10.72–29.19) | 124.66 (62.46–210.40) | 27.61 (14.22–45.71) | 1.2 (1.13 to 1.28) |
| Ethiopia | 1965.25 (907.77–3840.14) | 14.40 (6.25–27.78) | 8300.81 (4214.82–11948.84) | 25.13 (12.59–36.04) | 1.77 (1.64 to 1.9) |
| Fiji | 40.38 (30.38–54.11) | 14.47 (10.91–19.04) | 85.48 (58.93–118.36) | 18.67 (12.92–25.58) | 0.66 (0.56 to 0.76) |
| Finland | 2035.36 (1906.26–2178.87) | 58.03 (54.22–62.06) | 2043.70 (1817.16–2244.85) | 43.62 (39.29–47.69) | -0.9 (-1.14 to -0.66) |
| France | 20255.11 (18713.84–21603.38) | 54.93 (50.79–58.61) | 22558.08 (20151.25–24780.81) | 41.83 (37.84–45.92) | -0.69 (-0.87 to -0.52) |
| Gabon | 44.41 (33.15–61.63) | 12.79 (9.47–17.71) | 157.73 (97.21–233.93) | 21.43 (13.56–31.71) | 1.49 (1.42 to 1.56) |
| Gambia | 12.88 (8.91–17.34) | 5.38 (3.79–7.02) | 74.10 (44.75–108.98) | 9.84 (6.14–14.21) | 1.6 (1.33 to 1.86) |
| Georgia | 386.56 (303.99–483.82) | 11.47 (8.97–14.38) | 1339.73 (1142.58–1553.91) | 50.61 (43.30–58.66) | 6.01 (5.57 to 6.45) |
| Germany | 40022.87 (36526.33–43129.07) | 66.22 (60.52–71.50) | 30644.06 (27422.14–33194.66) | 41.53 (37.85–44.71) | -1.64 (-1.72 to -1.55) |
| Ghana | 359.34 (251.79–465.33) | 7.38 (5.14–9.65) | 1883.61 (1129.47–2661.58) | 13.97 (8.28–20.21) | 2 (1.94 to 2.06) |
| Greece | 2955.94 (2769.69–3129.05) | 42.46 (39.84–44.98) | 3642.27 (3348.75–3940.05) | 41.88 (38.69–45.23) | -0.29 (-0.43 to -0.14) |
| Greenland | 13.86 (11.05–16.80) | 62.89 (51.47–76.09) | 17.94 (12.70–25.43) | 52.61 (37.49–72.96) | -0.67 (-0.86 to -0.47) |
| Grenada | 13.01 (9.92–17.22) | 36.25 (27.42–48.45) | 29.75 (25.57–34.50) | 51.79 (44.35–60.09) | 1.29 (1.19 to 1.39) |
| Guam | 10.41 (8.09–17.52) | 19.80 (15.48–33.19) | 34.34 (26.09–40.96) | 38.01 (28.91–45.44) | 3.07 (2.51 to 3.63) |
| Guatemala | 176.01 (164.19–189.68) | 6.20 (5.82–6.60) | 1047.16 (876.61–1220.98) | 14.40 (12.03–16.84) | 3.3 (2.88 to 3.73) |
| Guinea | 127.21 (94.44–165.27) | 6.38 (4.79–8.22) | 419.15 (224.33–604.44) | 9.95 (5.54–14.37) | 1.36 (1.33 to 1.39) |
| Guinea-Bissau | 19.73 (13.70–29.20) | 6.50 (4.59–9.65) | 76.04 (52.77–107.30) | 11.34 (7.94–15.68) | 1.85 (1.82 to 1.87) |
| Guyana | 77.77 (63.27–94.49) | 27.04 (22.80–31.96) | 176.82 (129.94–234.66) | 45.19 (33.18–59.67) | 1.83 (1.44 to 2.23) |
| Haiti | 374.49 (226.49–988.99) | 16.70 (10.20–41.40) | 1329.87 (824.43–2695.83) | 24.36 (15.39–47.05) | 1.34 (1.21 to 1.46) |
| Honduras | 346.07 (243.93–438.08) | 22.20 (16.52–27.94) | 1744.48 (910.35–2823.36) | 38.20 (21.32–60.30) | 1.61 (1.43 to 1.79) |
| Hungary | 3253.66 (2931.94–3552.29) | 46.47 (41.90–50.99) | 3204.44 (2753.02–3690.89) | 40.53 (34.59–46.84) | -0.31 (-0.55 to -0.07) |
| Iceland | 82.92 (75.19–90.02) | 61.84 (55.93–67.28) | 95.04 (83.69–106.39) | 39.52 (34.72–44.59) | -1.56 (-1.77 to -1.35) |
| India | 35205.35 (25446.48–47519.17) | 11.61 (8.39–15.47) | 141168.15 (116302.51–166635.81) | 20.44 (16.82–24.16) | 1.73 (1.61 to 1.84) |
| Indonesia | 17945.42 (12115.59–35035.84) | 23.52 (16.05–44.94) | 63954.69 (41198.19–101490.11) | 41.96 (27.16–66.74) | 1.65 (1.49 to 1.82) |
| Iran (Islamic Republic of) | 1632.50 (1031.28–2234.04) | 8.82 (5.96–11.92) | 7730.38 (4762.40–9140.57) | 16.75 (10.36–19.69) | 2.3 (2.14 to 2.46) |
| Iraq | 722.97 (516.64–1109.67) | 13.38 (9.41–20.26) | 3787.80 (2551.68–5605.18) | 22.71 (15.44–33.07) | 1.86 (1.75 to 1.98) |
| Ireland | 1273.86 (1191.18–1359.15) | 67.22 (62.89–71.84) | 1583.53 (1428.37–1758.51) | 44.90 (40.79–49.69) | -1.14 (-1.37 to -0.92) |
| Israel | 1136.96 (1050.61–1213.16) | 46.87 (43.35–50.15) | 1729.15 (1565.64–1906.44) | 30.80 (27.86–33.87) | -1.25 (-1.45 to -1.05) |
| Italy | 17621.79 (16710.27–18437.42) | 45.40 (43.11–47.51) | 20487.53 (18755.55–21722.55) | 40.39 (37.86–42.60) | -0.34 (-0.53 to -0.14) |
| Jamaica | 249.19 (210.91–288.16) | 26.26 (22.37–30.05) | 555.14 (411.97–737.75) | 35.51 (26.37–47.22) | 0.9 (0.65 to 1.16) |
| Japan | 25804.68 (24740.33–26763.51) | 30.90 (29.68–32.10) | 37423.63 (33582.54–39881.20) | 35.91 (33.56–37.69) | 0.51 (0.24 to 0.77) |
| Jordan | 139.38 (91.61–194.97) | 13.83 (8.99–18.94) | 1000.30 (606.18–1349.42) | 20.52 (12.64–27.85) | 1.19 (0.92 to 1.46) |
| Kazakhstan | 2127.39 (1785.06–2580.56) | 26.87 (22.47–32.72) | 3453.91 (2806.63–4167.69) | 32.11 (26.13–38.77) | 0.32 (0.07 to 0.57) |
| Kenya | 729.46 (299.81–1033.58) | 12.11 (4.98–17.02) | 4031.46 (2364.06–5731.76) | 22.75 (13.93–32.01) | 2.12 (2.01 to 2.24) |
| Kiribati | 0.91 (0.52–1.25) | 3.21 (1.89–4.34) | 3.36 (1.65–5.12) | 6.09 (3.06–9.12) | 2.04 (1.83 to 2.25) |
| Kuwait | 82.41 (74.38–90.66) | 21.34 (19.31–23.51) | 452.65 (376.87–544.16) | 19.26 (16.26–22.88) | -0.9 (-1.27 to -0.53) |
| Kyrgyzstan | 277.90 (232.77–330.87) | 15.41 (12.93–18.54) | 1139.79 (912.18–1424.34) | 35.11 (28.17–43.73) | 3.9 (3.25 to 4.54) |
| Lao People's Democratic Republic | 260.78 (133.00–652.36) | 17.61 (9.23–42.48) | 1508.74 (880.44–2530.36) | 44.45 (26.65–74.21) | 3.19 (3.06 to 3.31) |
| Latvia | 548.77 (488.35–619.16) | 28.84 (25.60–32.61) | 645.86 (544.31–756.88) | 39.65 (33.01–46.73) | 0.76 (0.41 to 1.12) |
| Lebanon | 262.36 (185.47–417.70) | 20.41 (14.56–32.27) | 925.64 (601.51–1225.60) | 29.53 (19.37–39.28) | 1.32 (1.16 to 1.48) |
| Lesotho | 75.21 (50.10–108.59) | 12.41 (8.26–18.07) | 175.54 (101.31–318.35) | 22.49 (13.01–40.67) | 2.17 (2.05 to 2.29) |
| Liberia | 39.75 (28.28–56.22) | 5.75 (4.24–8.08) | 201.98 (123.76–282.71) | 11.54 (7.20–16.48) | 2.54 (2.4 to 2.68) |
| Libya | 217.71 (145.58–297.69) | 19.44 (12.80–26.72) | 1171.75 (802.72–1618.26) | 33.50 (23.06–45.99) | 1.77 (1.58 to 1.97) |
| Lithuania | 865.97 (784.65–947.31) | 36.90 (33.45–40.32) | 892.47 (749.45–1033.28) | 39.17 (32.80–45.48) | -0.36 (-0.85 to 0.13) |
| Luxembourg | 172.33 (159.88–186.33) | 65.39 (60.89–70.72) | 193.66 (173.66–215.17) | 41.08 (36.85–45.86) | -1.3 (-1.52 to -1.08) |
| Madagascar | 596.92 (381.55–822.49) | 16.66 (10.90–22.56) | 2187.95 (1354.98–3200.13) | 21.89 (13.57–31.80) | 0.81 (0.63 to 0.98) |
| Malawi | 301.38 (201.14–404.25) | 10.28 (7.00–13.68) | 1137.26 (479.06–1851.38) | 17.88 (7.86–28.01) | 1.91 (1.75 to 2.07) |
| Malaysia | 1322.87 (1003.38–2332.67) | 20.79 (16.14–34.56) | 5787.22 (4484.69–8927.86) | 36.39 (28.29–55.74) | 2.1 (1.67 to 2.53) |
| Maldives | 15.91 (8.61–45.64) | 24.55 (13.67–67.35) | 95.46 (64.44–139.79) | 45.97 (31.96–65.31) | 1.83 (1.42 to 2.25) |
| Mali | 103.35 (75.11–128.11) | 3.85 (2.78–4.76) | 370.47 (219.06–511.72) | 5.51 (3.26–7.54) | 1.13 (1.11 to 1.16) |
| Malta | 120.32 (109.23–130.09) | 53.78 (48.82–58.19) | 175.05 (154.52–198.41) | 49.00 (43.50–56.02) | -0.4 (-0.56 to -0.24) |
| Marshall Islands | 1.35 (0.91–2.18) | 11.23 (7.54–17.86) | 5.98 (2.93–10.57) | 23.89 (11.84–41.48) | 2.4 (2.27 to 2.54) |
| Mauritania | 38.79 (28.93–53.13) | 6.12 (4.60–8.50) | 178.57 (98.61–257.96) | 11.91 (6.55–17.11) | 2 (1.92 to 2.08) |
| Mauritius | 180.86 (166.40–196.74) | 35.77 (33.01–38.83) | 586.01 (527.19–634.26) | 71.74 (64.01–77.98) | 1.93 (1.49 to 2.37) |
| Mexico | 6991.00 (6825.56–7178.29) | 22.07 (21.56–22.64) | 27676.67 (23167.74–32583.37) | 38.34 (32.14–45.08) | 1.78 (1.73 to 1.84) |
| Micronesia (Federated States of) | 3.94 (2.35–6.32) | 12.41 (7.45–19.92) | 11.94 (5.86–18.78) | 25.22 (12.50–39.34) | 2.3 (2.16 to 2.44) |
| Monaco | 12.62 (7.99–19.80) | 50.08 (32.15–76.89) | 14.29 (9.28–23.98) | 44.09 (27.73–73.83) | -0.55 (-0.61 to -0.49) |
| Mongolia | 130.06 (87.87–188.18) | 18.14 (12.42–25.59) | 409.65 (290.89–540.11) | 24.57 (17.39–32.50) | 0.98 (0.86 to 1.11) |
| Montenegro | 119.21 (88.01–153.81) | 35.13 (25.95–45.29) | 146.21 (102.12–195.60) | 32.94 (23.10–44.09) | 0.13 (-0.18 to 0.44) |
| Morocco | 805.90 (550.24–1047.43) | 9.22 (6.12–12.03) | 3347.53 (2134.24–4758.65) | 17.28 (11.07–24.42) | 2.07 (2.03 to 2.11) |
| Mozambique | 722.47 (394.85–1055.96) | 16.42 (9.26–23.74) | 2454.83 (1407.74–3633.38) | 24.90 (14.79–36.71) | 1.35 (1.23 to 1.48) |
| Myanmar | 4373.35 (2638.24–8393.20) | 25.92 (16.09–47.95) | 13766.28 (9039.92–21070.10) | 45.03 (29.68–68.75) | 1.6 (1.49 to 1.7) |
| Namibia | 52.40 (37.20–67.97) | 11.65 (8.33–15.14) | 183.36 (105.96–288.37) | 18.16 (10.72–28.29) | 1.19 (1.09 to 1.3) |
| Nauru | 0.49 (0.28–0.88) | 14.51 (8.53–25.90) | 1.15 (0.50–2.16) | 25.48 (11.56–46.81) | 1.84 (1.8 to 1.88) |
| Nepal | 655.68 (365.45–1062.75) | 10.46 (5.75–16.79) | 2956.61 (1953.85–5246.82) | 19.66 (12.99–34.03) | 2.03 (2 to 2.06) |
| Netherlands | 5059.37 (4707.47–5378.34) | 53.99 (50.16–57.29) | 4730.42 (4303.61–5161.65) | 33.72 (30.88–36.42) | -1.86 (-2.05 to -1.67) |
| New Zealand | 1066.07 (983.28–1145.66) | 55.82 (51.40–60.21) | 1079.25 (971.65–1188.91) | 30.35 (27.35–33.38) | -2.05 (-2.25 to -1.84) |
| Nicaragua | 118.31 (93.41–151.66) | 9.21 (7.35–12.32) | 564.32 (405.89–712.73) | 17.55 (12.64–22.03) | 2.3 (1.99 to 2.61) |
| Niger | 87.33 (55.85–127.98) | 4.27 (2.85–6.23) | 412.72 (256.58–625.93) | 6.31 (3.92–9.31) | 1.27 (1.22 to 1.33) |
| Nigeria | 1798.79 (1060.54–2617.16) | 7.06 (4.18–10.18) | 9181.84 (4940.49–13870.54) | 12.60 (7.04–18.53) | 1.98 (1.81 to 2.16) |
| Niue | 0.17 (0.11–0.22) | 15.72 (10.42–21.52) | 0.33 (0.18–0.47) | 35.24 (19.29–50.08) | 2.01 (1.83 to 2.2) |
| North Macedonia | 345.44 (281.98–430.64) | 32.94 (26.85–40.95) | 606.37 (425.45–811.25) | 39.00 (27.31–52.01) | 0.63 (0.36 to 0.9) |
| Northern Mariana Islands | 2.58 (1.63–4.94) | 16.52 (10.74–30.78) | 10.10 (7.72–12.21) | 36.50 (27.69–43.78) | 3.14 (2.72 to 3.56) |
| Norway | 1718.72 (1624.87–1806.13) | 61.92 (58.64–64.95) | 1714.91 (1584.70–1829.04) | 41.52 (38.64–44.26) | -1.3 (-1.63 to -0.96) |
| Oman | 27.55 (11.99–43.63) | 6.97 (3.07–11.03) | 133.18 (87.53–183.09) | 10.20 (6.92–13.56) | 1.15 (0.77 to 1.54) |
| Pakistan | 6802.79 (4546.96–8597.97) | 20.08 (13.55–24.89) | 33023.95 (18823.63–48589.79) | 36.63 (21.50–54.34) | 1.74 (1.6 to 1.87) |
| Palau | 0.29 (0.19–0.41) | 4.50 (3.01–6.23) | 0.65 (0.45–0.86) | 6.50 (4.66–8.44) | 1.07 (0.93 to 1.2) |
| Palestine | 78.79 (50.29–121.82) | 13.01 (8.37–19.99) | 389.58 (283.08–491.24) | 21.16 (15.21–26.56) | 1.66 (1.57 to 1.75) |
| Panama | 125.79 (115.25–138.17) | 12.77 (11.74–13.99) | 650.69 (528.13–780.75) | 29.46 (23.90–35.36) | 2.78 (2.48 to 3.08) |
| Papua New Guinea | 110.74 (53.75–181.93) | 8.39 (4.32–13.62) | 543.11 (258.24–858.46) | 13.74 (6.76–21.25) | 1.44 (1.3 to 1.57) |
| Paraguay | 180.56 (140.80–241.88) | 12.28 (9.58–16.87) | 697.22 (471.72–952.26) | 20.58 (13.94–28.13) | 1.57 (1.35 to 1.79) |
| Peru | 1422.87 (1086.76–1896.05) | 17.55 (13.34–23.00) | 5605.13 (3813.23–7622.14) | 30.11 (20.54–40.71) | 1.77 (1.58 to 1.95) |
| Philippines | 8272.83 (6062.47–9854.89) | 33.94 (25.55–40.20) | 30706.68 (21162.34–39899.40) | 56.61 (39.54–73.43) | 1.59 (1.54 to 1.64) |
| Poland | 11072.24 (10640.72–11491.59) | 49.88 (47.76–51.86) | 13964.88 (12419.92–15501.54) | 45.85 (40.53–51.12) | -0.27 (-0.48 to -0.05) |
| Portugal | 1637.21 (1522.67–1746.14) | 25.69 (23.84–27.48) | 1711.05 (1551.98–1867.24) | 18.82 (17.11–20.50) | -1.15 (-1.35 to -0.94) |
| Puerto Rico | 270.01 (246.07–293.79) | 14.06 (12.79–15.33) | 759.74 (628.07–898.83) | 30.91 (25.35–36.83) | 2.54 (1.82 to 3.26) |
| Qatar | 24.02 (16.66–32.55) | 29.01 (20.62–38.91) | 228.77 (142.29–347.20) | 35.90 (22.70–49.57) | 1 (0.79 to 1.22) |
| Republic of Korea | 3219.21 (2501.66–3702.27) | 14.70 (12.21–17.70) | 10933.06 (7336.05–12863.61) | 27.46 (18.63–32.02) | 1.99 (1.76 to 2.21) |
| Republic of Moldova | 752.14 (697.70–807.56) | 29.73 (27.54–31.96) | 613.98 (528.27–699.62) | 21.50 (18.62–24.38) | -0.75 (-1.13 to -0.37) |
| Romania | 4992.49 (4633.72–5315.21) | 36.59 (33.82–38.93) | 6102.61 (5182.15–7009.53) | 40.91 (34.55–47.13) | 0.43 (0.29 to 0.57) |
| Russian Federation | 45515.09 (44159.51–46493.23) | 47.46 (45.92–48.56) | 48888.11 (43374.48–54436.85) | 43.52 (38.63–48.56) | -0.35 (-0.49 to -0.21) |
| Rwanda | 465.96 (242.78–776.63) | 20.85 (10.92–35.08) | 1625.61 (971.79–2357.92) | 31.64 (19.38–45.70) | 1.5 (1.31 to 1.69) |
| Saint Kitts and Nevis | 5.99 (4.34–7.89) | 32.98 (23.89–43.10) | 12.31 (9.71–15.25) | 32.51 (25.91–40.26) | -0.03 (-0.15 to 0.09) |
| Saint Lucia | 18.13 (15.10–22.51) | 34.39 (28.70–42.81) | 49.03 (39.38–59.79) | 42.85 (34.29–52.40) | 0.59 (0.48 to 0.7) |
| Saint Vincent and the Grenadines | 13.83 (12.30–16.54) | 32.63 (29.13–39.02) | 27.25 (23.47–31.85) | 42.24 (36.19–49.62) | 0.67 (0.51 to 0.83) |
| Samoa | 9.49 (6.90–12.73) | 18.15 (13.48–24.12) | 24.68 (16.32–34.53) | 29.72 (19.78–41.48) | 1.53 (1.42 to 1.63) |
| San Marino | 4.57 (3.46–6.15) | 28.78 (21.65–38.43) | 5.06 (2.98–7.64) | 18.44 (10.79–28.26) | -0.63 (-0.93 to -0.34) |
| Sao Tome and Principe | 4.58 (3.06–5.92) | 11.79 (8.24–15.35) | 19.49 (10.78–30.91) | 23.40 (13.27–36.06) | 2.18 (2.04 to 2.32) |
| Saudi Arabia | 401.83 (269.96–687.18) | 10.98 (7.42–18.39) | 2996.16 (2038.63–4858.44) | 19.89 (13.71–31.47) | 1.86 (1.66 to 2.07) |
| Senegal | 138.48 (93.21–179.18) | 6.19 (4.29–8.06) | 658.24 (387.20–967.88) | 11.77 (6.82–17.24) | 2.14 (2.01 to 2.26) |
| Serbia | 1873.03 (1479.57–2369.09) | 31.81 (25.01–40.25) | 2585.56 (1821.51–3258.75) | 38.22 (27.07–49.69) | 0.63 (0.51 to 0.75) |
| Seychelles | 16.92 (13.71–21.81) | 53.05 (43.23–68.44) | 49.37 (36.52–60.65) | 86.65 (63.63–105.88) | 1.82 (1.62 to 2.02) |
| Sierra Leone | 63.73 (36.44–89.04) | 5.02 (2.98–6.84) | 266.25 (164.53–372.05) | 9.27 (5.68–12.84) | 2.13 (2.02 to 2.23) |
| Singapore | 471.69 (439.24–506.23) | 31.45 (29.43–33.71) | 1237.80 (1122.92–1345.10) | 31.93 (28.94–34.50) | 0.11 (-0.17 to 0.38) |
| Slovakia | 1302.93 (1020.08–1543.74) | 42.63 (33.41–50.84) | 1763.98 (1282.46–2229.79) | 42.01 (30.66–53.28) | -0.01 (-0.16 to 0.13) |
| Slovenia | 456.10 (407.86–502.97) | 36.21 (32.41–39.90) | 458.24 (379.80–547.97) | 27.46 (22.52–33.12) | -0.65 (-0.94 to -0.36) |
| Solomon Islands | 6.50 (2.10–11.51) | 7.02 (2.38–12.11) | 46.39 (23.76–73.75) | 17.59 (9.25–28.33) | 3.07 (2.96 to 3.18) |
| Somalia | 265.61 (138.64–501.85) | 12.94 (6.93–24.32) | 907.49 (562.77–1481.91) | 16.10 (10.02–26.52) | 0.71 (0.68 to 0.74) |
| South Africa | 2559.50 (2130.17–3244.10) | 17.41 (14.54–21.74) | 7368.69 (5927.70–8661.65) | 25.08 (20.08–29.40) | 1.33 (1.21 to 1.45) |
| South Sudan | 232.62 (143.62–360.20) | 15.66 (10.02–24.00) | 617.12 (393.68–934.23) | 20.39 (13.34–30.32) | 0.81 (0.63 to 1) |
| Spain | 13459.72 (12409.12–14422.47) | 54.66 (50.32–58.50) | 16037.85 (14375.85–17856.22) | 41.41 (37.56–45.52) | -1.03 (-1.17 to -0.89) |
| Sri Lanka | 1645.83 (1331.03–2155.51) | 21.63 (17.70–27.98) | 4873.11 (2954.33–6864.90) | 35.86 (21.82–50.87) | 1.82 (1.67 to 1.96) |
| Sudan | 390.81 (111.27–847.06) | 6.31 (1.72–13.76) | 1798.11 (1010.46–3023.20) | 11.53 (6.47–18.92) | 2.05 (1.88 to 2.22) |
| Suriname | 45.62 (35.01–55.48) | 28.44 (22.52–34.50) | 116.26 (89.01–148.67) | 35.36 (26.95–45.09) | 0.86 (0.74 to 0.99) |
| Sweden | 3885.43 (3684.94–4085.85) | 65.45 (61.86–68.71) | 2510.24 (2184.19–2877.97) | 32.26 (28.00–37.01) | -2.27 (-2.54 to -2) |
| Switzerland | 1874.39 (1675.18–2041.01) | 40.43 (36.25–43.85) | 2100.48 (1838.60–2373.77) | 28.03 (24.72–31.52) | -1.5 (-1.94 to -1.05) |
| Syrian Arab Republic | 321.39 (217.54–460.68) | 8.67 (5.86–12.30) | 1045.53 (694.73–1506.20) | 13.50 (8.94–19.49) | 1.22 (1.07 to 1.37) |
| Taiwan (Province of China) | 2752.29 (2499.64–3016.39) | 29.00 (26.36–31.63) | 9318.67 (8182.99–10319.95) | 53.40 (46.71–59.23) | 1.64 (1.35 to 1.93) |
| Tajikistan | 150.25 (105.74–238.60) | 8.44 (6.00–13.00) | 420.04 (285.22–579.80) | 9.71 (6.70–13.21) | 0.38 (0.31 to 0.45) |
| Thailand | 7232.51 (5102.96–9140.36) | 28.18 (19.77–35.28) | 26103.82 (14860.54–35809.06) | 56.60 (31.35–78.19) | 2.1 (1.87 to 2.32) |
| Timor-Leste | 33.61 (17.44–64.10) | 13.64 (7.49–24.76) | 179.41 (107.83–254.86) | 32.81 (20.01–46.16) | 3.11 (2.81 to 3.42) |
| Togo | 67.79 (46.32–90.26) | 6.53 (4.44–8.52) | 352.87 (206.40–520.32) | 11.18 (6.52–16.40) | 1.65 (1.54 to 1.76) |
| Tokelau | 0.09 (0.06–0.14) | 13.88 (8.84–20.47) | 0.22 (0.12–0.31) | 32.47 (17.61–44.95) | 2.28 (2.11 to 2.46) |
| Tonga | 3.54 (1.71–4.83) | 10.38 (5.01–14.09) | 8.34 (4.16–12.30) | 18.32 (9.16–27.00) | 1.74 (1.59 to 1.88) |
| Trinidad and Tobago | 196.08 (179.57–227.62) | 38.88 (35.48–45.44) | 401.65 (300.56–518.33) | 46.31 (34.53–60.24) | 0.46 (0.29 to 0.64) |
| Tunisia | 402.76 (306.11–522.06) | 13.44 (10.13–17.33) | 1505.76 (1005.43–2171.71) | 21.38 (14.23–30.87) | 1.37 (1.29 to 1.45) |
| Turkey | 5628.04 (3718.74–9471.50) | 25.05 (16.72–40.84) | 15309.02 (10449.86–19790.70) | 31.23 (21.23–40.25) | 0.71 (0.61 to 0.8) |
| Turkmenistan | 164.42 (145.70–183.96) | 12.33 (11.01–13.72) | 683.21 (507.19–926.72) | 26.90 (19.98–36.43) | 3.98 (1.91 to 6.08) |
| Tuvalu | 0.45 (0.27–0.77) | 10.10 (6.19–17.13) | 1.27 (0.71–1.93) | 22.50 (12.56–34.29) | 2.52 (2.31 to 2.73) |
| Uganda | 793.91 (527.22–1114.97) | 17.55 (11.98–24.19) | 4436.53 (2601.62–6530.58) | 33.71 (20.69–48.74) | 1.56 (1.33 to 1.8) |
| Ukraine | 12904.36 (10884.11–15090.06) | 35.43 (29.89–41.79) | 14061.74 (8768.25–20608.28) | 39.93 (24.51–59.17) | 0.41 (0.11 to 0.7) |
| United Arab Emirates | 141.98 (92.63–236.99) | 43.36 (27.78–78.77) | 1195.29 (859.57–1747.24) | 72.32 (56.20–93.54) | 2.23 (1.94 to 2.52) |
| United Kingdom | 27040.35 (26261.11–27562.45) | 70.16 (68.57–71.41) | 25727.95 (24260.64–26597.86) | 49.69 (47.68–51.11) | -1.12 (-1.32 to -0.91) |
| United Republic of Tanzania | 1503.73 (894.72–2087.75) | 19.31 (11.63–25.95) | 5663.72 (3431.38–8123.09) | 28.36 (17.77–39.72) | 1.24 (1.12 to 1.35) |
| United States Virgin Islands | 18.30 (13.90–27.39) | 33.66 (25.63–50.21) | 24.52 (16.70–34.61) | 41.31 (27.17–60.41) | 1.26 (0.85 to 1.67) |
| United States of America | 88468.93 (85248.03–90632.01) | 57.45 (55.77–58.72) | 96275.47 (91057.36–100149.22) | 38.55 (36.91–40.06) | -1.37 (-1.55 to -1.19) |
| Uruguay | 659.01 (588.78–734.16) | 35.83 (31.85–40.07) | 938.33 (852.17–1025.30) | 40.64 (37.01–44.72) | 0.33 (0.23 to 0.44) |
| Uzbekistan | 772.25 (587.91–975.30) | 10.31 (7.84–13.07) | 3028.81 (2304.32–3844.67) | 17.24 (13.13–21.84) | 1.45 (1.09 to 1.81) |
| Vanuatu | 2.73 (1.13–5.47) | 6.07 (2.53–11.80) | 15.52 (7.63–27.49) | 12.44 (6.12–21.86) | 2.1 (1.96 to 2.24) |
| Venezuela (Bolivarian Republic of) | 620.41 (583.14–661.75) | 8.15 (7.70–8.68) | 4890.00 (3494.88–6533.25) | 31.34 (22.32–42.04) | 3.85 (2.74 to 4.97) |
| Viet Nam | 3030.20 (2225.22–3996.18) | 11.66 (8.61–15.31) | 14175.52 (9341.94–19569.74) | 24.34 (16.36–33.41) | 2.33 (2.22 to 2.45) |
| Yemen | 140.91 (20.77–300.29) | 4.31 (0.62–9.18) | 948.54 (440.77–1582.23) | 8.80 (4.16–14.74) | 2.59 (2.43 to 2.74) |
| Zambia | 437.84 (234.81–620.91) | 19.62 (10.95–26.92) | 1845.37 (1035.78–2966.44) | 29.75 (17.34–46.54) | 1.33 (1.1 to 1.57) |
| Zimbabwe | 503.04 (373.77–664.43) | 17.86 (13.34–23.52) | 1913.68 (1182.31–2705.12) | 33.44 (20.86–46.72) | 2.36 (1.95 to 2.78) |

**Abbreviations**: ASR, age-standardized rate; OC, ovarian cancer; EAPC, estimated annual percentage change; UIs, uncertainty intervals; CI, conﬁdence interval.

| **Table S3** Global and regional DALYs of OC in 1990 and 2021, and EAPC of ASR from 1990 to 2021 | | | | | |
| --- | --- | --- | --- | --- | --- |
| **Location** | **1990** | | **2021** | | **EAPC (95% CI) 1990-2021** |
| **Number (95% UIs)** | **ASR (95% UIs)** | **Number (95% UIs)** | **ASR (95% UIs)** |
| Afghanistan | 2200.92 (899.01–5416.44) | 58.89 (23.21–139.00) | 6375.92 (3302.58–15041.53) | 85.92 (41.78–188.03) | 1.36 (1.18 to 1.55) |
| Albania | 742.05 (583.12–949.65) | 63.20 (50.01–80.80) | 1320.54 (915.21–1840.71) | 64.10 (44.60–88.62) | 0.5 (0.32 to 0.68) |
| Algeria | 2728.81 (1949.47–3537.88) | 39.83 (28.27–51.30) | 9357.98 (6721.44–12775.40) | 47.86 (33.97–64.92) | 0.72 (0.68 to 0.76) |
| American Samoa | 7.73 (4.85–10.27) | 56.85 (36.36–74.74) | 23.77 (12.02–34.88) | 92.79 (46.78–137.11) | 1.72 (1.66 to 1.79) |
| Andorra | 20.26 (12.82–30.86) | 71.72 (45.49–109.52) | 35.35 (23.93–48.31) | 49.16 (33.12–67.31) | -0.94 (-1.1 to -0.78) |
| Angola | 1321.67 (677.10–2099.07) | 53.04 (26.19–82.35) | 7508.84 (3834.33–11530.05) | 87.54 (44.18–132.39) | 1.89 (1.75 to 2.02) |
| Antigua and Barbuda | 39.68 (35.76–43.78) | 142.03 (127.38–157.42) | 109.45 (101.17–118.22) | 187.38 (173.77–201.89) | 1.14 (0.98 to 1.3) |
| Argentina | 32425.04 (29244.63–36057.63) | 186.17 (167.98–206.78) | 40687.33 (37026.57–44078.01) | 142.61 (130.20–154.59) | -0.6 (-0.74 to -0.46) |
| Armenia | 1921.07 (1567.55–2468.95) | 118.17 (96.96–151.33) | 3329.15 (2728.53–3958.75) | 141.63 (115.98–168.73) | 0.84 (0.63 to 1.04) |
| Australia | 26721.54 (24542.54–28424.93) | 267.05 (244.79–283.21) | 24875.54 (22225.40–27072.01) | 117.26 (105.32–127.29) | -2.52 (-2.88 to -2.17) |
| Austria | 16414.98 (15409.41–17311.95) | 265.65 (249.72–280.79) | 11157.60 (9913.34–12118.23) | 129.43 (117.07–140.39) | -2.06 (-2.17 to -1.95) |
| Azerbaijan | 2197.86 (1450.25–3140.17) | 71.00 (47.05–101.57) | 5568.92 (3546.75–8281.35) | 87.44 (55.97–129.94) | 1.05 (0.7 to 1.41) |
| Bahamas | 222.95 (191.08–269.97) | 224.49 (192.43–271.05) | 585.15 (463.01–727.57) | 246.78 (195.87–305.87) | 0.51 (0.39 to 0.62) |
| Bahrain | 190.54 (142.95–249.94) | 185.63 (139.56–242.92) | 916.72 (601.50–1212.25) | 196.14 (130.80–255.71) | -0.1 (-0.2 to 0) |
| Bangladesh | 18666.13 (12085.01–27993.52) | 72.73 (45.75–108.14) | 73861.79 (44583.61–129952.29) | 97.66 (59.81–171.28) | 0.85 (0.81 to 0.9) |
| Barbados | 269.43 (244.61–296.43) | 186.20 (168.07–206.52) | 456.93 (362.35–574.92) | 183.11 (144.55–231.24) | 0.35 (0.22 to 0.48) |
| Belarus | 11389.37 (10232.12–12671.70) | 151.67 (136.05–169.72) | 13687.52 (10702.71–17092.21) | 162.01 (125.68–204.14) | -0.02 (-0.56 to 0.52) |
| Belgium | 20335.21 (18874.05–21682.04) | 265.38 (246.55–281.96) | 14557.00 (12924.99–16084.43) | 135.13 (122.53–148.78) | -2.23 (-2.33 to -2.12) |
| Belize | 28.37 (24.28–32.87) | 55.91 (47.83–65.21) | 143.32 (126.81–163.14) | 80.02 (70.86–90.67) | 1.24 (0.9 to 1.58) |
| Benin | 461.91 (319.00–618.04) | 39.16 (27.46–52.24) | 1889.25 (1230.07–2580.57) | 55.61 (36.68–75.23) | 1.04 (0.96 to 1.11) |
| Bermuda | 87.53 (71.52–106.07) | 250.04 (204.39–302.85) | 111.06 (90.72–138.97) | 180.13 (147.35–224.25) | -1.38 (-1.61 to -1.16) |
| Bhutan | 113.01 (70.46–180.99) | 75.39 (46.86–120.67) | 360.54 (231.58–646.52) | 112.04 (72.83–200.17) | 1.18 (1.11 to 1.25) |
| Bolivia (Plurinational State of) | 1462.64 (1021.30–2658.64) | 73.90 (51.76–135.29) | 7006.78 (4465.48–9772.22) | 133.41 (85.42–186.28) | 2.01 (1.85 to 2.18) |
| Bosnia and Herzegovina | 3490.55 (2867.17–4114.55) | 140.94 (116.20–166.03) | 4925.13 (3436.60–6396.15) | 162.47 (113.13–212.39) | 0.86 (0.7 to 1.02) |
| Botswana | 332.99 (203.92–475.31) | 91.28 (56.44–130.21) | 1256.76 (607.84–1893.48) | 129.75 (64.60–191.50) | 1.4 (1.22 to 1.58) |
| Brazil | 60286.27 (58058.27–62359.90) | 110.37 (106.01–114.37) | 160734.23 (151111.06–169167.12) | 117.91 (110.96–124.12) | -0.05 (-0.14 to 0.05) |
| Brunei Darussalam | 144.06 (105.85–202.75) | 211.12 (160.87–287.40) | 461.17 (354.65–583.62) | 207.72 (159.98–258.31) | 0.22 (0.16 to 0.29) |
| Bulgaria | 11192.88 (10212.28–12382.99) | 184.06 (167.09–204.53) | 15053.26 (12504.51–17944.41) | 243.12 (199.08–293.68) | 0.83 (0.59 to 1.07) |
| Burkina Faso | 1102.66 (615.25–1481.73) | 42.11 (23.52–57.00) | 3408.42 (2108.64–4802.49) | 57.61 (35.82–80.74) | 1.08 (0.98 to 1.18) |
| Burundi | 1827.73 (927.43–2859.89) | 123.41 (63.56–194.92) | 4043.45 (2371.42–5626.43) | 129.66 (76.92–180.99) | -0.01 (-0.12 to 0.09) |
| Cabo Verde | 21.84 (14.90–31.80) | 16.95 (11.59–24.91) | 154.04 (60.01–219.93) | 58.68 (22.69–84.26) | 4.25 (3.51 to 4.99) |
| Cambodia | 2765.93 (1638.38–5194.70) | 85.66 (51.84–155.72) | 14437.07 (8702.29–21982.45) | 178.66 (108.83–270.54) | 2.41 (2.37 to 2.45) |
| Cameroon | 1349.63 (1049.64–1760.07) | 48.58 (37.76–63.15) | 5847.05 (3493.24–8439.54) | 69.80 (41.96–98.61) | 1.15 (1.07 to 1.24) |
| Canada | 29928.31 (27877.85–31612.67) | 179.61 (168.19–189.54) | 44541.16 (40590.30–48472.10) | 132.26 (121.54–142.65) | -0.9 (-1.07 to -0.74) |
| Central African Republic | 477.32 (322.93–870.27) | 63.54 (43.09–110.22) | 1210.12 (798.53–1867.23) | 77.88 (51.40–117.15) | 0.66 (0.59 to 0.73) |
| Chad | 514.92 (261.83–737.42) | 31.90 (16.37–45.41) | 1696.25 (965.08–2445.55) | 49.09 (28.34–70.68) | 1.5 (1.44 to 1.55) |
| Chile | 6606.43 (6089.30–7163.12) | 115.46 (106.38–125.29) | 15395.44 (14051.29–16776.35) | 118.16 (108.00–128.68) | -0.04 (-0.36 to 0.29) |
| China | 402037.07 (288619.19–527088.85) | 82.98 (60.96–108.14) | 750548.81 (545756.13–991109.83) | 71.16 (51.75–94.42) | -0.99 (-1.16 to -0.82) |
| Colombia | 14698.72 (13798.68–15509.04) | 135.58 (127.71–142.95) | 43516.92 (35908.17–51574.13) | 147.58 (121.81–175.29) | 0.35 (0.18 to 0.52) |
| Comoros | 157.22 (89.20–227.27) | 126.25 (75.86–180.72) | 546.87 (296.04–866.33) | 180.73 (98.51–280.91) | 0.96 (0.84 to 1.09) |
| Congo | 535.49 (373.21–892.83) | 78.16 (55.66–127.81) | 2141.24 (1428.38–3051.80) | 118.75 (81.12–166.78) | 1.36 (1.26 to 1.46) |
| Cook Islands | 2.02 (1.38–2.77) | 30.66 (21.25–41.36) | 4.99 (3.32–6.91) | 40.47 (26.85–55.98) | 0.97 (0.85 to 1.09) |
| Costa Rica | 684.52 (635.71–741.69) | 68.73 (63.70–74.87) | 3301.07 (2890.76–3716.04) | 113.22 (99.18–127.21) | 1.36 (1.09 to 1.63) |
| Coted'Ivoire | 1906.70 (1347.16–2496.96) | 78.78 (56.35–102.72) | 7387.09 (4613.41–10658.02) | 107.48 (69.39–154.98) | 1.07 (0.99 to 1.15) |
| Croatia | 7737.08 (6998.68–8371.64) | 223.12 (200.31–241.00) | 7678.62 (6545.96–8814.16) | 185.44 (159.17–212.25) | -0.4 (-0.61 to -0.2) |
| Cuba | 4080.48 (3749.09–4402.38) | 78.14 (71.80–84.46) | 10580.64 (8787.62–12256.12) | 114.61 (95.43–132.58) | 0.69 (0.46 to 0.92) |
| Cyprus | 763.06 (586.78–1044.12) | 177.10 (137.45–244.80) | 1416.38 (1019.42–1864.33) | 136.90 (99.46–179.58) | -0.69 (-0.87 to -0.51) |
| Czechia | 16091.77 (14989.21–17367.32) | 224.21 (209.14–241.94) | 17858.89 (15302.76–20452.83) | 180.58 (154.54–207.07) | -0.58 (-0.86 to -0.29) |
| Democratic People's Republic of Korea | 7840.48 (4935.26–11709.39) | 72.23 (45.99–106.34) | 16317.08 (10862.25–23341.61) | 90.14 (59.88–128.21) | 0.81 (0.75 to 0.86) |
| Democratic Republic of the Congo | 6208.11 (3962.56–9825.86) | 60.16 (38.18–95.67) | 21606.02 (11366.61–32324.58) | 88.38 (46.02–130.54) | 1.3 (1.04 to 1.56) |
| Denmark | 8949.95 (7884.58–9958.45) | 238.08 (211.46–263.30) | 8915.96 (7975.43–9763.16) | 158.36 (143.84–172.90) | -2.04 (-2.53 to -1.55) |
| Djibouti | 108.36 (57.23–160.72) | 121.11 (66.27–176.71) | 610.21 (304.75–950.55) | 156.72 (80.87–240.03) | 0.81 (0.74 to 0.88) |
| Dominica | 29.70 (19.27–38.84) | 86.61 (58.12–113.11) | 39.94 (29.09–50.84) | 96.20 (69.85–122.62) | 0.48 (0.37 to 0.58) |
| Dominican Republic | 1261.49 (1002.88–1604.18) | 54.31 (43.24–69.61) | 3765.23 (2831.32–4795.13) | 70.18 (53.05–89.23) | 1.12 (1.01 to 1.23) |
| Ecuador | 577.68 (528.11–630.30) | 18.15 (16.55–19.84) | 10683.19 (8338.39–13478.51) | 120.94 (94.42–152.21) | 6.39 (4.56 to 8.25) |
| Egypt | 5781.30 (4256.33–11736.52) | 34.52 (24.82–74.88) | 28776.63 (21749.24–36567.33) | 80.01 (61.69–101.11) | 3.31 (2.78 to 3.85) |
| El Salvador | 1278.28 (1114.82–1628.21) | 71.39 (61.86–93.01) | 4412.41 (2968.63–5688.59) | 125.82 (84.48–162.02) | 2 (1.8 to 2.21) |
| Equatorial Guinea | 73.25 (44.94–132.01) | 57.97 (35.39–101.82) | 424.98 (218.06–701.54) | 110.56 (59.58–181.69) | 2.31 (2.19 to 2.44) |
| Eritrea | 980.32 (614.39–1476.71) | 115.77 (74.44–170.40) | 3392.22 (2221.02–5098.83) | 167.83 (110.20–248.77) | 1.18 (1.1 to 1.26) |
| Estonia | 2651.08 (2369.52–2958.85) | 227.19 (203.84–253.46) | 2086.89 (1728.03–2477.98) | 162.11 (136.43–191.31) | -1.26 (-2.01 to -0.5) |
| Eswatini | 231.15 (134.97–363.18) | 118.83 (69.96–188.02) | 661.86 (349.22–1084.42) | 169.03 (92.18–274.42) | 1.16 (1 to 1.32) |
| Ethiopia | 13132.29 (5673.59–25302.05) | 112.14 (46.93–215.06) | 40430.18 (19885.25–57414.75) | 150.20 (73.98–213.93) | 0.85 (0.74 to 0.96) |
| Fiji | 142.90 (106.07–194.02) | 61.13 (45.82–82.47) | 305.72 (212.01–420.69) | 68.55 (47.65–93.74) | 0.31 (0.24 to 0.39) |
| Finland | 8365.08 (7846.99–8880.81) | 220.52 (207.29–234.30) | 7550.76 (6614.34–8302.79) | 133.85 (119.89–146.02) | -1.6 (-1.75 to -1.45) |
| France | 87317.10 (80767.89–92771.50) | 212.97 (197.47–225.36) | 86624.57 (76197.51–96743.15) | 131.62 (118.13–145.53) | -1.49 (-1.6 to -1.39) |
| Gabon | 278.59 (205.45–391.21) | 84.34 (61.90–119.39) | 773.39 (492.07–1138.96) | 118.12 (76.44–171.73) | 0.98 (0.91 to 1.05) |
| Gambia | 70.96 (50.93–93.82) | 36.20 (26.00–47.43) | 356.64 (222.72–511.62) | 58.34 (36.68–83.26) | 1.25 (1.01 to 1.48) |
| Georgia | 2225.92 (1758.38–2791.50) | 62.32 (49.17–78.06) | 8102.27 (6810.32–9385.94) | 268.19 (224.56–311.23) | 5.88 (5.47 to 6.28) |
| Germany | 175346.23 (160093.83–187938.33) | 261.91 (240.31–279.37) | 126203.31 (111307.04–138160.82) | 146.11 (131.72–157.92) | -1.91 (-2.01 to -1.81) |
| Ghana | 1856.19 (1278.60–2429.13) | 45.25 (31.57–59.39) | 8902.88 (5328.99–12923.74) | 76.87 (45.96–113.45) | 1.75 (1.71 to 1.79) |
| Greece | 12829.25 (12070.20–13592.10) | 169.16 (159.43–178.36) | 16436.94 (14912.99–17752.41) | 160.44 (148.72–171.40) | -0.49 (-0.65 to -0.33) |
| Greenland | 69.80 (57.59–83.95) | 355.42 (296.98–424.79) | 83.79 (60.85–118.96) | 234.54 (173.27–324.12) | -1.51 (-1.72 to -1.3) |
| Grenada | 65.71 (50.00–87.62) | 183.40 (138.84–245.89) | 143.53 (123.66–165.19) | 241.14 (208.66–277.28) | 1.2 (1.05 to 1.36) |
| Guam | 29.99 (23.64–50.46) | 67.89 (54.52–112.71) | 99.42 (75.52–120.73) | 100.87 (76.51–121.35) | 2.21 (1.81 to 2.61) |
| Guatemala | 812.11 (770.77–857.28) | 34.35 (32.47–36.30) | 4634.86 (3928.71–5388.58) | 69.95 (59.35–81.43) | 2.89 (2.47 to 3.31) |
| Guinea | 838.93 (627.70–1094.28) | 45.91 (34.57–60.31) | 2193.40 (1220.84–3150.75) | 63.21 (35.64–89.61) | 1.02 (1 to 1.04) |
| Guinea-Bissau | 119.42 (84.45–179.55) | 46.35 (33.16–70.08) | 387.36 (270.54–538.76) | 72.06 (49.56–99.37) | 1.49 (1.45 to 1.53) |
| Guyana | 389.38 (331.51–454.59) | 160.08 (137.30–187.54) | 888.81 (650.53–1166.78) | 234.07 (171.98–305.99) | 1.54 (1.16 to 1.93) |
| Haiti | 2346.72 (1445.18–5735.62) | 118.30 (71.49–274.38) | 7320.04 (4609.39–13752.57) | 153.22 (97.93–277.58) | 0.94 (0.85 to 1.02) |
| Honduras | 1633.19 (1248.16–2032.58) | 122.27 (94.76–152.84) | 7773.19 (4550.99–12036.03) | 190.81 (118.45–300.56) | 1.35 (1.2 to 1.5) |
| Hungary | 18279.07 (16445.18–19810.08) | 238.18 (215.21–259.20) | 17281.19 (14925.67–19607.72) | 186.94 (161.61–211.92) | -0.62 (-0.84 to -0.4) |
| Iceland | 354.01 (325.54–386.21) | 252.90 (232.35–276.23) | 380.88 (331.00–423.80) | 141.56 (124.02–157.77) | -1.95 (-2.12 to -1.78) |
| India | 201484.47 (145601.23–268250.32) | 74.07 (53.70–98.01) | 712412.71 (600595.93–847441.67) | 107.69 (90.97–128.10) | 1.09 (0.98 to 1.2) |
| Indonesia | 60954.96 (42515.96–114826.65) | 92.69 (65.70–171.80) | 186917.18 (121865.63–309820.43) | 126.56 (83.24–210.85) | 0.87 (0.75 to 0.98) |
| Iran (Islamic Republic of) | 6688.26 (4897.40–9199.83) | 42.37 (31.65–57.96) | 28986.30 (19521.58–33613.58) | 66.08 (44.75–76.62) | 1.78 (1.62 to 1.93) |
| Iraq | 3400.02 (2431.91–5135.91) | 72.26 (51.49–108.29) | 14884.62 (10127.62–21189.83) | 100.19 (69.78–138.77) | 1.16 (1.07 to 1.25) |
| Ireland | 5855.26 (5432.53–6234.56) | 293.25 (272.09–311.69) | 6457.13 (5765.03–7173.34) | 168.93 (152.39–186.99) | -1.68 (-1.83 to -1.54) |
| Israel | 5386.95 (5008.99–5733.78) | 217.30 (201.92–231.49) | 7580.74 (6786.91–8315.25) | 124.90 (112.96–137.31) | -1.75 (-1.91 to -1.59) |
| Italy | 76533.95 (72911.63–79342.73) | 174.38 (166.58–180.34) | 87782.99 (78330.49–93938.70) | 138.81 (127.82–147.00) | -0.75 (-0.87 to -0.64) |
| Jamaica | 1198.58 (1051.82–1350.03) | 131.96 (115.62–148.48) | 2514.57 (1910.29–3228.59) | 159.85 (121.28–205.55) | 0.6 (0.39 to 0.8) |
| Japan | 111747.58 (107725.39–114971.21) | 127.93 (123.68–131.45) | 126933.74 (113293.04–135381.81) | 106.13 (99.90–110.37) | -0.6 (-0.69 to -0.51) |
| Jordan | 624.06 (401.10–858.68) | 74.91 (47.60–103.11) | 3828.24 (2387.96–5155.00) | 88.90 (55.78–117.84) | 0.39 (0.11 to 0.68) |
| Kazakhstan | 11372.12 (9534.56–13779.18) | 144.61 (120.97–175.78) | 17083.04 (13863.42–20684.47) | 155.99 (126.78–188.65) | -0.06 (-0.35 to 0.24) |
| Kenya | 3998.17 (1623.71–5643.55) | 79.00 (32.08–111.43) | 19388.08 (11948.14–27225.40) | 128.69 (80.52–179.10) | 1.74 (1.65 to 1.82) |
| Kiribati | 3.68 (2.29–4.94) | 15.11 (9.70–20.31) | 11.83 (6.18–17.25) | 24.13 (12.91–34.71) | 1.54 (1.39 to 1.68) |
| Kuwait | 315.00 (285.97–346.53) | 106.28 (96.30–117.12) | 1374.61 (1149.52–1660.50) | 72.39 (60.81–86.30) | -1.36 (-1.68 to -1.04) |
| Kyrgyzstan | 1682.40 (1397.03–2020.37) | 94.48 (78.61–113.96) | 5479.41 (4356.45–6804.61) | 176.08 (139.45–217.31) | 3.28 (2.64 to 3.94) |
| Lao People's Democratic Republic | 1128.45 (618.28–2644.17) | 86.42 (47.84–195.36) | 4531.72 (2768.21–7269.28) | 151.44 (93.75–242.20) | 1.98 (1.89 to 2.07) |
| Latvia | 3965.71 (3544.65–4442.15) | 194.99 (174.22–219.00) | 4502.02 (3797.37–5241.06) | 244.78 (204.15–287.90) | 0.51 (0.15 to 0.87) |
| Lebanon | 1323.04 (959.25–2049.47) | 108.80 (78.98–167.50) | 3877.08 (2595.18–5075.12) | 122.74 (82.64–160.98) | 0.55 (0.36 to 0.74) |
| Lesotho | 477.47 (316.00–698.84) | 83.51 (55.35–121.69) | 1089.37 (650.86–1949.91) | 151.73 (91.96–272.98) | 2.3 (2.08 to 2.52) |
| Liberia | 247.46 (182.32–346.00) | 41.29 (30.89–56.74) | 928.91 (576.22–1336.92) | 67.38 (42.43–96.90) | 1.81 (1.68 to 1.94) |
| Libya | 1057.59 (688.82–1464.54) | 106.32 (68.58–146.36) | 4969.97 (3401.16–6844.30) | 157.63 (107.80–215.07) | 1.36 (1.21 to 1.51) |
| Lithuania | 5526.08 (5004.22–5989.59) | 216.77 (196.04–235.51) | 5913.41 (4951.35–6841.86) | 213.57 (179.65–249.12) | -0.65 (-1.12 to -0.17) |
| Luxembourg | 842.51 (787.12–902.02) | 294.52 (276.13–314.39) | 823.38 (739.58–913.76) | 159.83 (144.22–177.18) | -1.67 (-1.83 to -1.51) |
| Madagascar | 3441.88 (2247.25–4666.70) | 111.89 (74.10–151.32) | 10477.45 (6482.15–15641.59) | 127.93 (79.30–190.82) | 0.41 (0.23 to 0.59) |
| Malawi | 1777.00 (1202.90–2366.99) | 71.40 (48.93–95.12) | 5482.57 (2430.25–8578.73) | 106.25 (48.33–162.11) | 1.31 (1.22 to 1.39) |
| Malaysia | 4693.78 (3726.30–7264.48) | 84.39 (67.64–126.05) | 16978.99 (13530.47–24258.03) | 110.82 (88.50–157.89) | 1.2 (0.85 to 1.54) |
| Maldives | 53.47 (29.95–150.61) | 103.32 (59.32–270.02) | 219.60 (154.00–308.71) | 118.20 (84.57–157.27) | 0.13 (-0.12 to 0.38) |
| Mali | 649.35 (474.01–803.67) | 27.20 (19.68–33.84) | 1878.51 (1117.75–2571.85) | 34.05 (20.60–46.37) | 0.72 (0.69 to 0.75) |
| Malta | 553.10 (504.07–597.17) | 239.82 (218.58–259.31) | 775.64 (682.72–874.73) | 183.08 (161.96–205.46) | -1.1 (-1.26 to -0.95) |
| Marshall Islands | 5.09 (3.46–8.26) | 51.98 (35.41–82.85) | 20.21 (10.23–33.44) | 91.95 (46.90–148.82) | 1.87 (1.74 to 1.99) |
| Mauritania | 246.69 (186.09–340.03) | 43.21 (32.58–59.98) | 851.91 (469.10–1236.22) | 65.96 (36.36–95.79) | 1.23 (1.16 to 1.31) |
| Mauritius | 516.57 (480.87–560.85) | 114.45 (106.60–124.28) | 1670.29 (1502.79–1794.16) | 182.32 (163.82–195.34) | 1.26 (0.83 to 1.69) |
| Mexico | 31627.27 (30871.09–32399.81) | 118.37 (115.33–121.39) | 120242.49 (100732.64–141881.34) | 167.79 (140.86–197.71) | 1.13 (1.08 to 1.19) |
| Micronesia (Federated States of) | 15.77 (9.67–24.88) | 57.36 (35.41–89.68) | 41.27 (20.77–63.58) | 92.55 (47.38–141.33) | 1.58 (1.5 to 1.67) |
| Monaco | 56.77 (36.31–91.40) | 190.77 (121.27–301.94) | 63.09 (41.10–106.04) | 154.50 (99.54–258.50) | -0.83 (-0.88 to -0.77) |
| Mongolia | 746.78 (514.95–1051.29) | 116.74 (81.32–164.45) | 2139.09 (1528.75–2825.24) | 135.18 (96.05–177.90) | 0.42 (0.29 to 0.56) |
| Montenegro | 542.93 (404.00–701.81) | 156.47 (116.17–202.44) | 737.58 (521.65–987.62) | 149.38 (105.51–199.86) | 0.08 (-0.22 to 0.38) |
| Morocco | 4603.61 (3063.58–5994.58) | 57.91 (38.01–75.79) | 16516.74 (10201.07–23329.47) | 87.33 (53.97–122.02) | 1.43 (1.39 to 1.47) |
| Mozambique | 4324.68 (2422.89–6134.96) | 112.54 (64.71–156.38) | 12398.76 (7263.09–18594.49) | 154.41 (92.69–229.15) | 1.1 (1 to 1.21) |
| Myanmar | 16475.63 (10555.42–29990.87) | 111.85 (73.47–195.49) | 42588.68 (29762.87–61023.87) | 141.07 (99.04–202.34) | 0.59 (0.51 to 0.67) |
| Namibia | 310.64 (224.02–400.28) | 77.18 (56.37–99.44) | 944.10 (565.28–1444.69) | 103.60 (63.25–155.84) | 0.7 (0.55 to 0.84) |
| Nauru | 1.69 (1.00–3.02) | 62.57 (38.00–108.65) | 3.54 (1.64–6.29) | 90.89 (43.66–156.64) | 1.31 (1.27 to 1.35) |
| Nepal | 3990.09 (2251.07–6283.00) | 72.34 (41.03–113.71) | 14576.24 (9682.37–25353.99) | 105.47 (70.33–181.77) | 1.18 (1.12 to 1.24) |
| Netherlands | 25503.07 (23638.87–26940.64) | 251.68 (234.25–265.66) | 24538.70 (21877.69–26960.44) | 148.31 (134.55–161.17) | -1.91 (-2.02 to -1.81) |
| New Zealand | 4666.44 (4355.03–4984.29) | 235.50 (220.22–251.88) | 4526.22 (4046.40–5007.80) | 113.78 (102.37–125.45) | -2.39 (-2.57 to -2.22) |
| Nicaragua | 488.92 (390.37–661.19) | 46.27 (36.46–64.46) | 2288.90 (1656.71–2926.68) | 76.44 (55.49–97.39) | 1.83 (1.54 to 2.13) |
| Niger | 515.21 (345.09–757.76) | 30.43 (20.63–44.80) | 2216.16 (1384.62–3282.95) | 41.26 (26.16–60.86) | 0.99 (0.94 to 1.04) |
| Nigeria | 11533.45 (6703.37–16575.56) | 50.68 (29.61–72.40) | 49438.71 (28351.55–72219.68) | 80.59 (46.60–116.79) | 1.62 (1.48 to 1.76) |
| Niue | 0.70 (0.48–0.93) | 61.27 (41.22–81.29) | 1.03 (0.56–1.47) | 97.36 (53.50–138.17) | 1.24 (1.17 to 1.32) |
| North Macedonia | 1866.46 (1535.11–2324.65) | 179.34 (148.01–223.21) | 3231.18 (2346.50–4326.08) | 193.67 (140.74–258.12) | 0.24 (0.04 to 0.44) |
| Northern Mariana Islands | 6.57 (4.26–12.29) | 59.24 (40.21–107.58) | 30.51 (23.67–36.72) | 108.70 (83.56–128.33) | 2.6 (2.22 to 2.98) |
| Norway | 7849.42 (7451.41–8190.11) | 256.98 (246.09–267.75) | 7206.34 (6595.42–7684.69) | 153.33 (141.98–162.95) | -1.7 (-1.94 to -1.47) |
| Oman | 138.47 (59.09–219.97) | 40.57 (17.50–65.23) | 503.42 (339.47–670.52) | 46.62 (31.98–62.22) | 0.4 (0.04 to 0.76) |
| Pakistan | 40132.42 (27151.75–49740.75) | 134.99 (91.46–167.58) | 158996.54 (94939.06–236599.19) | 211.40 (129.12–311.60) | 1.27 (1.11 to 1.42) |
| Palau | 0.94 (0.64–1.32) | 16.67 (11.42–23.54) | 2.15 (1.51–2.94) | 19.79 (14.32–25.57) | 0.55 (0.5 to 0.61) |
| Palestine | 383.18 (246.45–571.25) | 71.35 (45.75–106.40) | 1541.55 (1107.32–1930.39) | 98.07 (70.09–122.71) | 1.19 (1.11 to 1.26) |
| Panama | 504.10 (467.99–542.15) | 58.44 (54.00–62.97) | 2583.96 (2077.20–3092.55) | 115.52 (92.88–138.27) | 2.32 (1.99 to 2.66) |
| Papua New Guinea | 428.14 (223.10–679.14) | 38.65 (20.85–60.99) | 1768.73 (877.41–2723.52) | 53.93 (27.98–80.26) | 1.04 (0.96 to 1.12) |
| Paraguay | 818.44 (628.61–1162.04) | 62.77 (47.90–90.74) | 3112.83 (2117.21–4287.19) | 96.76 (65.91–133.13) | 1.34 (1.1 to 1.58) |
| Peru | 6968.04 (5411.97–9034.33) | 97.80 (76.60–125.57) | 22794.08 (15730.48–30869.06) | 125.78 (86.94–169.94) | 0.71 (0.56 to 0.85) |
| Philippines | 24743.75 (18258.84–29205.75) | 123.63 (89.67–146.05) | 88182.27 (65452.36–112671.49) | 174.17 (131.39–221.84) | 1.2 (1.17 to 1.22) |
| Poland | 64654.73 (62499.89–66370.68) | 277.57 (268.01–284.87) | 83218.68 (74044.46–92177.16) | 237.91 (211.11–263.53) | -0.5 (-0.67 to -0.33) |
| Portugal | 9546.72 (8932.21–10167.70) | 135.04 (126.32–143.88) | 10476.40 (9343.09–11476.65) | 95.09 (85.92–103.57) | -1.26 (-1.44 to -1.08) |
| Puerto Rico | 1312.81 (1210.43–1424.18) | 68.15 (62.78–74.00) | 3446.98 (2804.70–4100.93) | 115.43 (94.10–137.64) | 1.68 (1.07 to 2.3) |
| Qatar | 89.07 (63.92–120.71) | 155.14 (110.82–209.86) | 708.93 (439.08–1015.43) | 157.81 (102.65–215.63) | 0.42 (0.21 to 0.62) |
| Republic of Korea | 14519.95 (12784.76–18269.31) | 71.32 (63.51–93.08) | 36575.05 (24150.12–43029.25) | 83.08 (57.25–96.83) | 0.32 (0.22 to 0.43) |
| Republic of Moldova | 4859.96 (4520.49–5178.01) | 185.84 (172.38–197.77) | 3796.75 (3275.86–4299.09) | 121.19 (104.59–137.05) | -1.11 (-1.47 to -0.74) |
| Romania | 26906.43 (25054.15–28471.29) | 184.77 (172.25–195.07) | 33682.36 (29048.21–38263.58) | 195.74 (168.32–223.40) | 0.19 (0.09 to 0.29) |
| Russian Federation | 228529.77 (221354.82–233821.13) | 217.95 (211.33–223.17) | 234848.09 (208591.57–261046.69) | 184.57 (163.73–205.39) | -0.64 (-0.79 to -0.49) |
| Rwanda | 2854.49 (1513.11–4843.77) | 148.64 (79.08–250.67) | 8185.50 (5006.74–11957.78) | 184.54 (114.71–268.36) | 0.61 (0.51 to 0.72) |
| Saint Kitts and Nevis | 34.96 (26.65–45.07) | 189.09 (143.95–243.30) | 64.41 (51.08–78.44) | 167.54 (133.59–201.72) | -0.21 (-0.33 to -0.08) |
| Saint Lucia | 89.77 (75.49–111.29) | 183.32 (153.99–227.12) | 233.77 (188.46–280.74) | 191.71 (154.64–230.24) | -0.06 (-0.18 to 0.07) |
| Saint Vincent and the Grenadines | 65.76 (58.22–79.09) | 167.09 (147.53–201.27) | 127.89 (111.05–148.19) | 188.44 (163.77–218.37) | 0.32 (0.15 to 0.5) |
| Samoa | 36.91 (27.84–48.96) | 78.03 (59.12–102.74) | 81.57 (53.85–112.68) | 103.86 (68.67–142.78) | 0.91 (0.86 to 0.96) |
| San Marino | 20.31 (15.49–27.36) | 116.92 (88.66–156.53) | 20.96 (12.52–30.66) | 64.86 (38.37–96.40) | -1.12 (-1.38 to -0.85) |
| Sao Tome and Principe | 27.64 (19.55–35.16) | 76.05 (54.42–96.47) | 87.40 (51.35–132.92) | 121.70 (73.72–186.44) | 1.46 (1.35 to 1.57) |
| Saudi Arabia | 1905.89 (1268.86–3131.45) | 63.44 (41.91–101.19) | 10568.12 (7192.48–16621.48) | 87.81 (61.02–135.35) | 0.97 (0.76 to 1.18) |
| Senegal | 775.10 (543.44–1017.08) | 40.55 (28.76–53.50) | 3274.32 (1903.28–4773.01) | 67.81 (39.26–99.45) | 1.79 (1.67 to 1.9) |
| Serbia | 11464.09 (9284.36–14292.74) | 186.62 (151.14–233.84) | 15608.59 (11091.38–19453.86) | 202.70 (144.87–254.76) | 0.24 (0.15 to 0.33) |
| Seychelles | 51.65 (42.53–68.28) | 171.53 (141.11–225.39) | 137.48 (103.43–167.00) | 225.96 (170.78–273.64) | 1.21 (1.03 to 1.39) |
| Sierra Leone | 384.11 (229.98–520.39) | 34.64 (21.22–46.72) | 1306.41 (803.90–1829.35) | 56.03 (34.84–79.02) | 1.72 (1.65 to 1.8) |
| Singapore | 2150.80 (2012.68–2289.01) | 153.36 (143.10–163.48) | 4146.99 (3770.68–4506.43) | 100.20 (91.43–108.35) | -1.31 (-1.47 to -1.14) |
| Slovakia | 7347.55 (5720.84–8621.86) | 230.42 (179.71–269.75) | 9146.20 (6627.81–11501.01) | 194.12 (141.22–242.72) | -0.54 (-0.64 to -0.43) |
| Slovenia | 2817.24 (2522.33–3100.91) | 207.25 (185.46–228.51) | 2847.27 (2377.40–3361.74) | 141.41 (117.43–168.05) | -1.02 (-1.25 to -0.8) |
| Solomon Islands | 26.38 (8.93–44.84) | 34.16 (11.95–57.81) | 152.05 (79.75–244.51) | 67.40 (36.63–107.61) | 2.37 (2.27 to 2.47) |
| Somalia | 1646.43 (885.76–3095.85) | 96.58 (53.15–177.09) | 5198.84 (3193.69–8547.82) | 113.06 (70.53–182.91) | 0.54 (0.51 to 0.56) |
| South Africa | 12793.02 (10588.47–16039.33) | 96.89 (76.98–123.19) | 40162.56 (31743.85–46663.32) | 141.67 (111.52–164.48) | 1.44 (1.32 to 1.56) |
| South Sudan | 1352.82 (866.77–2080.73) | 108.79 (71.09–164.78) | 3223.69 (2096.14–4779.11) | 128.61 (85.29–188.06) | 0.52 (0.37 to 0.66) |
| Spain | 41888.98 (38651.25–44887.62) | 156.93 (145.25–167.66) | 52030.37 (45264.50–58624.64) | 118.79 (105.62–131.77) | -1.03 (-1.16 to -0.91) |
| Sri Lanka | 4823.77 (3949.67–6133.93) | 73.25 (60.20–92.93) | 13732.80 (8005.03–19384.60) | 93.99 (55.12–132.93) | 1.13 (0.97 to 1.3) |
| Sudan | 2116.04 (559.06–4524.64) | 39.78 (10.02–86.85) | 7147.85 (4153.63–11624.86) | 56.96 (34.54–94.20) | 1.26 (1.11 to 1.41) |
| Suriname | 236.22 (195.54–290.29) | 159.79 (132.47–196.56) | 581.25 (455.81–759.77) | 170.20 (133.44–222.34) | 0.42 (0.3 to 0.54) |
| Sweden | 17647.82 (16686.37–18607.79) | 264.50 (250.25–278.56) | 12728.86 (10953.93–14484.24) | 132.24 (114.33–151.08) | -2.28 (-2.53 to -2.03) |
| Switzerland | 7157.89 (6314.89–7913.25) | 140.78 (125.65–154.38) | 8938.05 (7750.25–10179.06) | 103.45 (90.82–116.78) | -1.31 (-1.75 to -0.86) |
| Syrian Arab Republic | 1435.34 (998.99–2009.31) | 45.70 (31.96–63.96) | 4288.83 (2867.09–6153.88) | 57.40 (38.71–82.08) | 0.58 (0.46 to 0.7) |
| Taiwan (Province of China) | 6687.80 (6140.19–7189.06) | 77.73 (71.20–83.49) | 20230.00 (17577.52–22574.70) | 103.02 (89.82–114.71) | 0.66 (0.43 to 0.89) |
| Tajikistan | 821.22 (587.06–1202.45) | 50.23 (35.88–72.28) | 2083.02 (1463.81–2785.41) | 53.25 (37.80–70.61) | 0.07 (-0.01 to 0.16) |
| Thailand | 22656.58 (16080.23–28350.29) | 99.64 (70.59–124.26) | 70753.74 (43213.62–97573.35) | 132.45 (78.48–181.70) | 0.75 (0.64 to 0.87) |
| Timor-Leste | 127.10 (69.16–227.80) | 64.83 (35.55–113.43) | 544.87 (346.81–758.09) | 113.72 (73.51–159.30) | 2.02 (1.79 to 2.24) |
| Togo | 360.34 (246.99–470.77) | 42.51 (29.41–55.79) | 1762.23 (1014.56–2629.49) | 64.89 (37.81–96.00) | 1.32 (1.26 to 1.37) |
| Tokelau | 0.40 (0.26–0.56) | 58.81 (38.52–83.05) | 0.65 (0.36–0.95) | 90.45 (49.46–129.67) | 1.27 (1.19 to 1.35) |
| Tonga | 13.36 (6.18–17.94) | 42.37 (19.37–56.45) | 26.96 (13.72–39.20) | 61.09 (31.11–88.76) | 1.2 (1.1 to 1.29) |
| Trinidad and Tobago | 970.18 (881.46–1140.30) | 207.94 (187.76–246.41) | 1928.28 (1461.75–2455.28) | 205.39 (155.23–263.48) | -0.17 (-0.31 to -0.02) |
| Tunisia | 1971.03 (1453.69–2555.41) | 71.99 (52.62–93.63) | 6552.46 (4361.98–9336.98) | 92.22 (61.51–131.27) | 0.71 (0.66 to 0.77) |
| Turkey | 28405.06 (19379.82–44572.91) | 137.54 (94.74–211.65) | 65293.32 (45289.75–84022.43) | 130.23 (90.04–167.71) | -0.23 (-0.37 to -0.09) |
| Turkmenistan | 871.94 (776.27–967.02) | 70.89 (63.22–78.54) | 3300.62 (2500.76–4460.72) | 131.37 (100.02–177.47) | 3.54 (1.43 to 5.69) |
| Tuvalu | 1.97 (1.19–3.34) | 47.36 (28.22–80.30) | 4.50 (2.54–6.85) | 79.91 (45.05–121.16) | 1.71 (1.57 to 1.84) |
| Uganda | 4803.26 (3289.65–6633.77) | 124.59 (87.16–171.36) | 20861.75 (12510.30–29888.22) | 198.48 (120.90–281.17) | 0.99 (0.76 to 1.23) |
| Ukraine | 64512.86 (54872.50–75049.89) | 162.63 (138.15–190.02) | 67317.19 (42382.25–98043.63) | 173.66 (107.01–256.36) | 0.18 (-0.1 to 0.45) |
| United Arab Emirates | 572.00 (365.01–1010.54) | 251.44 (161.79–458.27) | 4458.29 (3310.30–6511.50) | 438.10 (342.36–561.86) | 2.78 (2.38 to 3.17) |
| United Kingdom | 127972.67 (124007.23–130712.23) | 300.83 (293.19–306.47) | 100849.33 (93634.28–105103.13) | 167.04 (158.11–172.85) | -1.99 (-2.13 to -1.86) |
| United Republic of Tanzania | 8510.38 (5138.75–11332.78) | 127.22 (77.53–167.76) | 27459.97 (17253.08–37627.44) | 164.57 (105.64–221.39) | 0.85 (0.77 to 0.93) |
| United States Virgin Islands | 86.19 (66.27–124.64) | 167.69 (130.20–239.14) | 123.23 (86.17–170.73) | 164.41 (113.71–227.89) | 0.49 (0.13 to 0.85) |
| United States of America | 358420.41 (342698.11–368931.36) | 220.55 (212.03–226.22) | 394812.01 (367615.40–412491.43) | 139.93 (132.39–145.89) | -1.54 (-1.7 to -1.39) |
| Uruguay | 3576.55 (3210.58–3978.26) | 181.05 (162.36–200.75) | 4555.96 (4108.93–4985.23) | 174.84 (157.76–190.87) | -0.17 (-0.26 to -0.08) |
| Uzbekistan | 3918.74 (3026.05–4893.11) | 56.34 (43.54–70.63) | 14795.59 (11367.80–18804.30) | 87.67 (67.48–110.98) | 1.18 (0.88 to 1.49) |
| Vanuatu | 10.20 (4.30–20.03) | 28.19 (12.00–55.09) | 52.53 (26.39–91.39) | 48.35 (24.86–83.91) | 1.67 (1.56 to 1.78) |
| Venezuela (Bolivarian Republic of) | 2508.17 (2380.75–2657.28) | 39.49 (37.12–41.97) | 21676.60 (15882.80–28612.40) | 133.81 (97.70–176.79) | 3.35 (2.22 to 4.5) |
| Viet Nam | 11509.35 (8195.21–14965.60) | 47.82 (33.82–62.52) | 43403.36 (27759.26–60076.08) | 73.98 (47.41–101.21) | 1.42 (1.36 to 1.48) |
| Yemen | 844.77 (123.69–1834.24) | 28.96 (4.08–63.84) | 4489.83 (2172.35–7424.15) | 49.26 (23.31–80.52) | 1.96 (1.81 to 2.1) |
| Zambia | 2402.99 (1341.64–3328.51) | 132.61 (74.82–179.96) | 8407.84 (4905.35–13180.49) | 171.84 (103.61–263.46) | 0.73 (0.58 to 0.88) |
| Zimbabwe | 2800.24 (2086.46–3654.19) | 116.21 (87.49–151.42) | 10263.97 (6332.42–14489.46) | 208.80 (130.27–291.99) | 2.3 (1.82 to 2.78) |

**Abbreviations**: ASR, age-standardized rate; DALYs, disability-adjusted life-years; OC, ovarian cancer; EAPC, estimated annual percentage change; UIs, uncertainty intervals; CI, conﬁdence interval.

| **Table S4** Changes in DALYs number of OC according to population-level determinants from 1990 to 2021 | | | | | |
| --- | --- | --- | --- | --- | --- |
| **Sex** | **Location** | **Overall Difference** | **Aging** | **Population** | **Epidemiological Change** |
| Female | Global | 2254020.74 | 867939.58 (38.51%) | 1954512.99 (86.71%) | -568431.83 (-25.22%) |
| High SDI | 84232.71 | 275629.54 (327.22%) | 335932.36 (398.81%) | -527329.19 (-626.04%) |
| High-middle SDI | 363868.81 | 281501.63 (77.36%) | 300940.04 (82.71%) | -218572.87 (-60.07%) |
| Middle SDI | 903031.61 | 300903.71 (33.32%) | 450761.19 (49.92%) | 151366.71 (16.76%) |
| Low-middle SDI | 660482.37 | 85440.26 (12.94%) | 355301.59 (53.79%) | 219740.52 (33.27%) |
| Low SDI | 240567.42 | -5064.14 (-2.11%) | 176873.89 (73.52%) | 68757.68 (28.58%) |

**Abbreviations**: DALYs, disability-adjusted life-years; OC, ovarian cancer; SDI, sociodemographic index.
