# Supplementary material for: Epidemiological Shifts in Ovarian Cancer Burden: Regional Differences and the Influence of Socioeconomic Factors
Source: Research Square preprint supplement (doi:10.21203/rs.3.rs-7031267/v1), 2025-08-08
Supplement: Supplementary file 2 [file 81509559942e2b9825c3d5ef.docx]

**Figure S1.** The role of interaction between two factors including age-period (A), age-cohort (B), and cohort-period (C) on the incidence of OC.


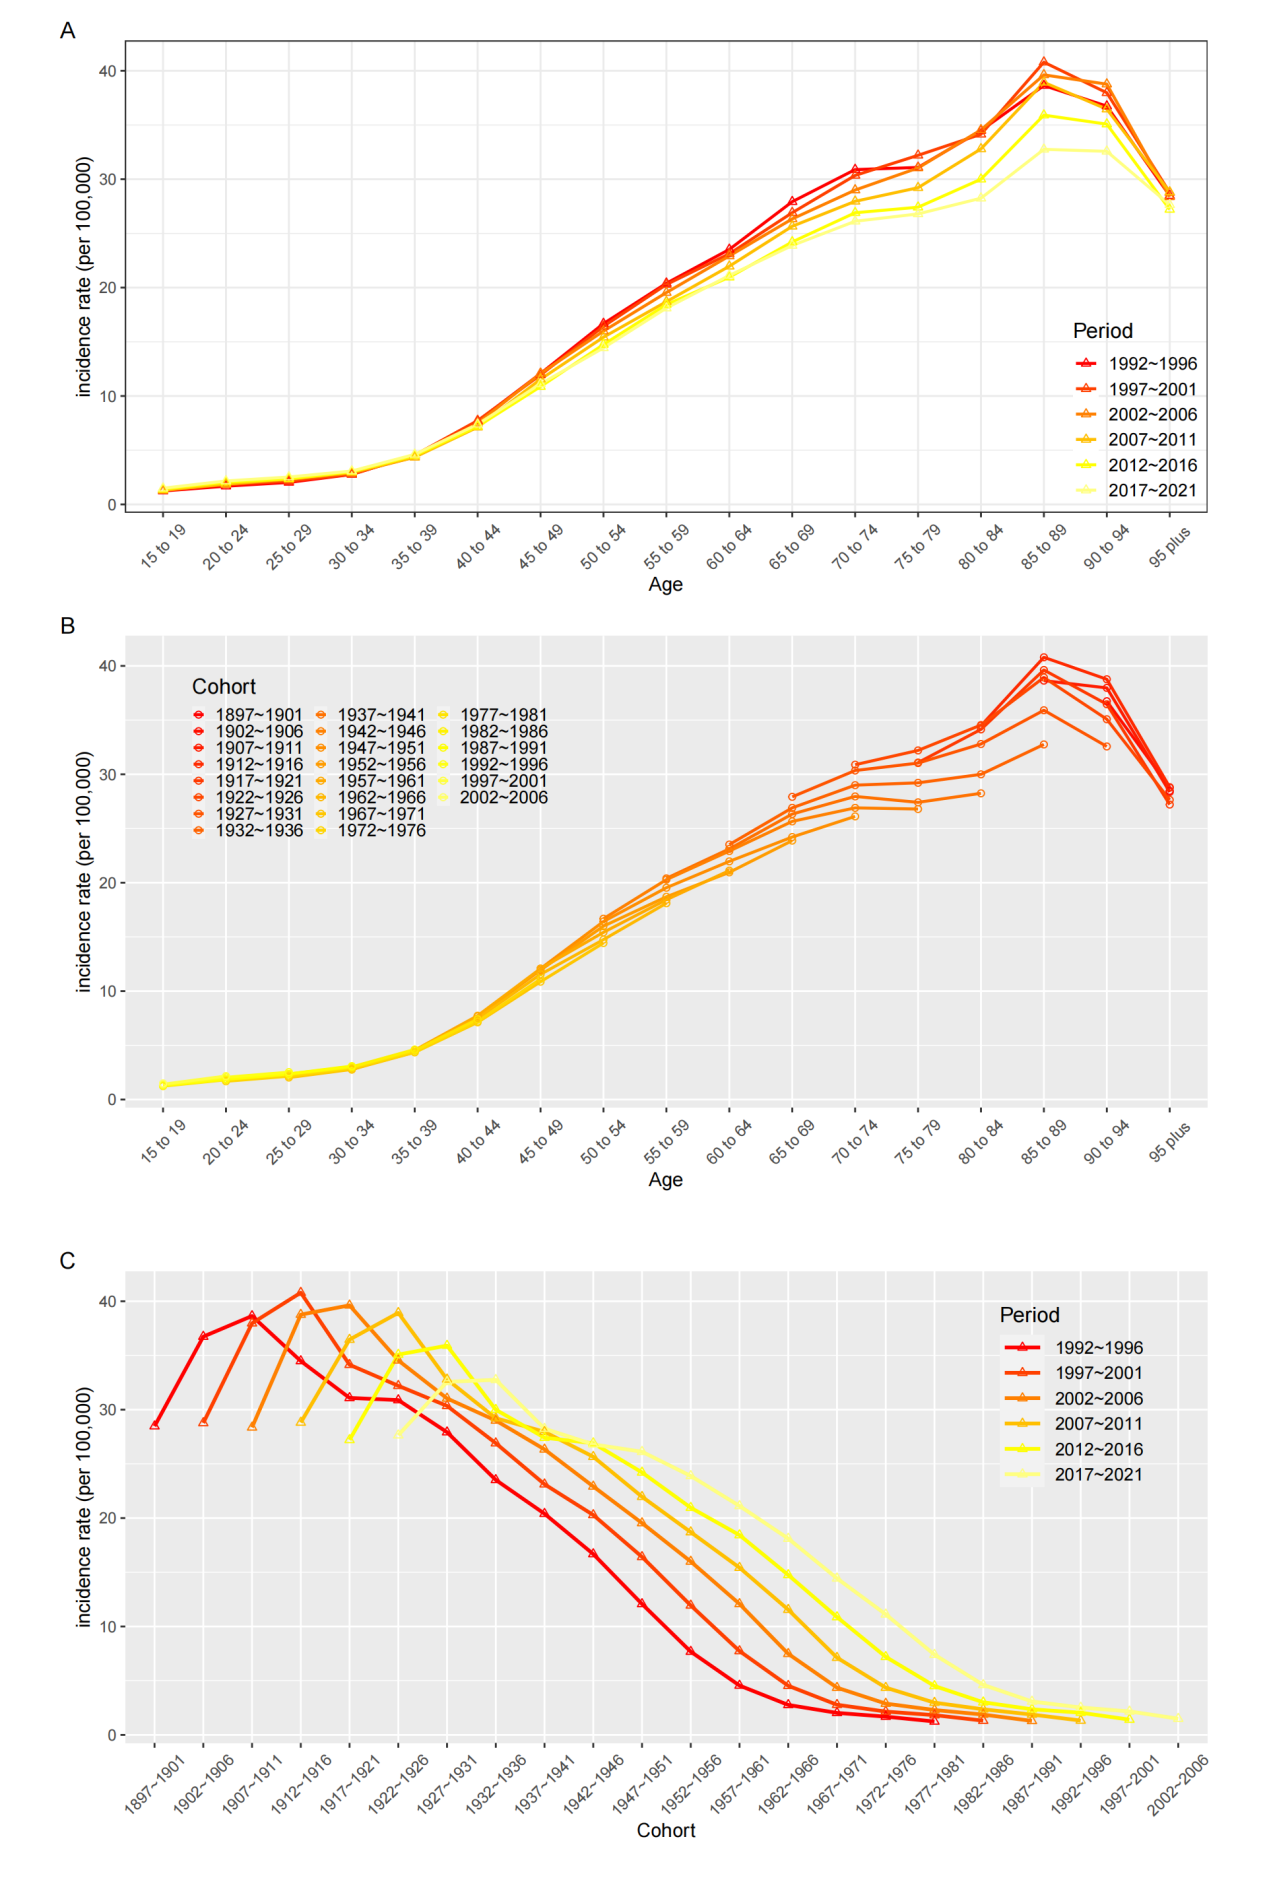


**Abbreviations:** OC, ovarian cancer.

**Figure S2.** The role of interaction between two factors including age-period (A), age-cohort (B), and cohort-period (C) on the prevalence of OC.


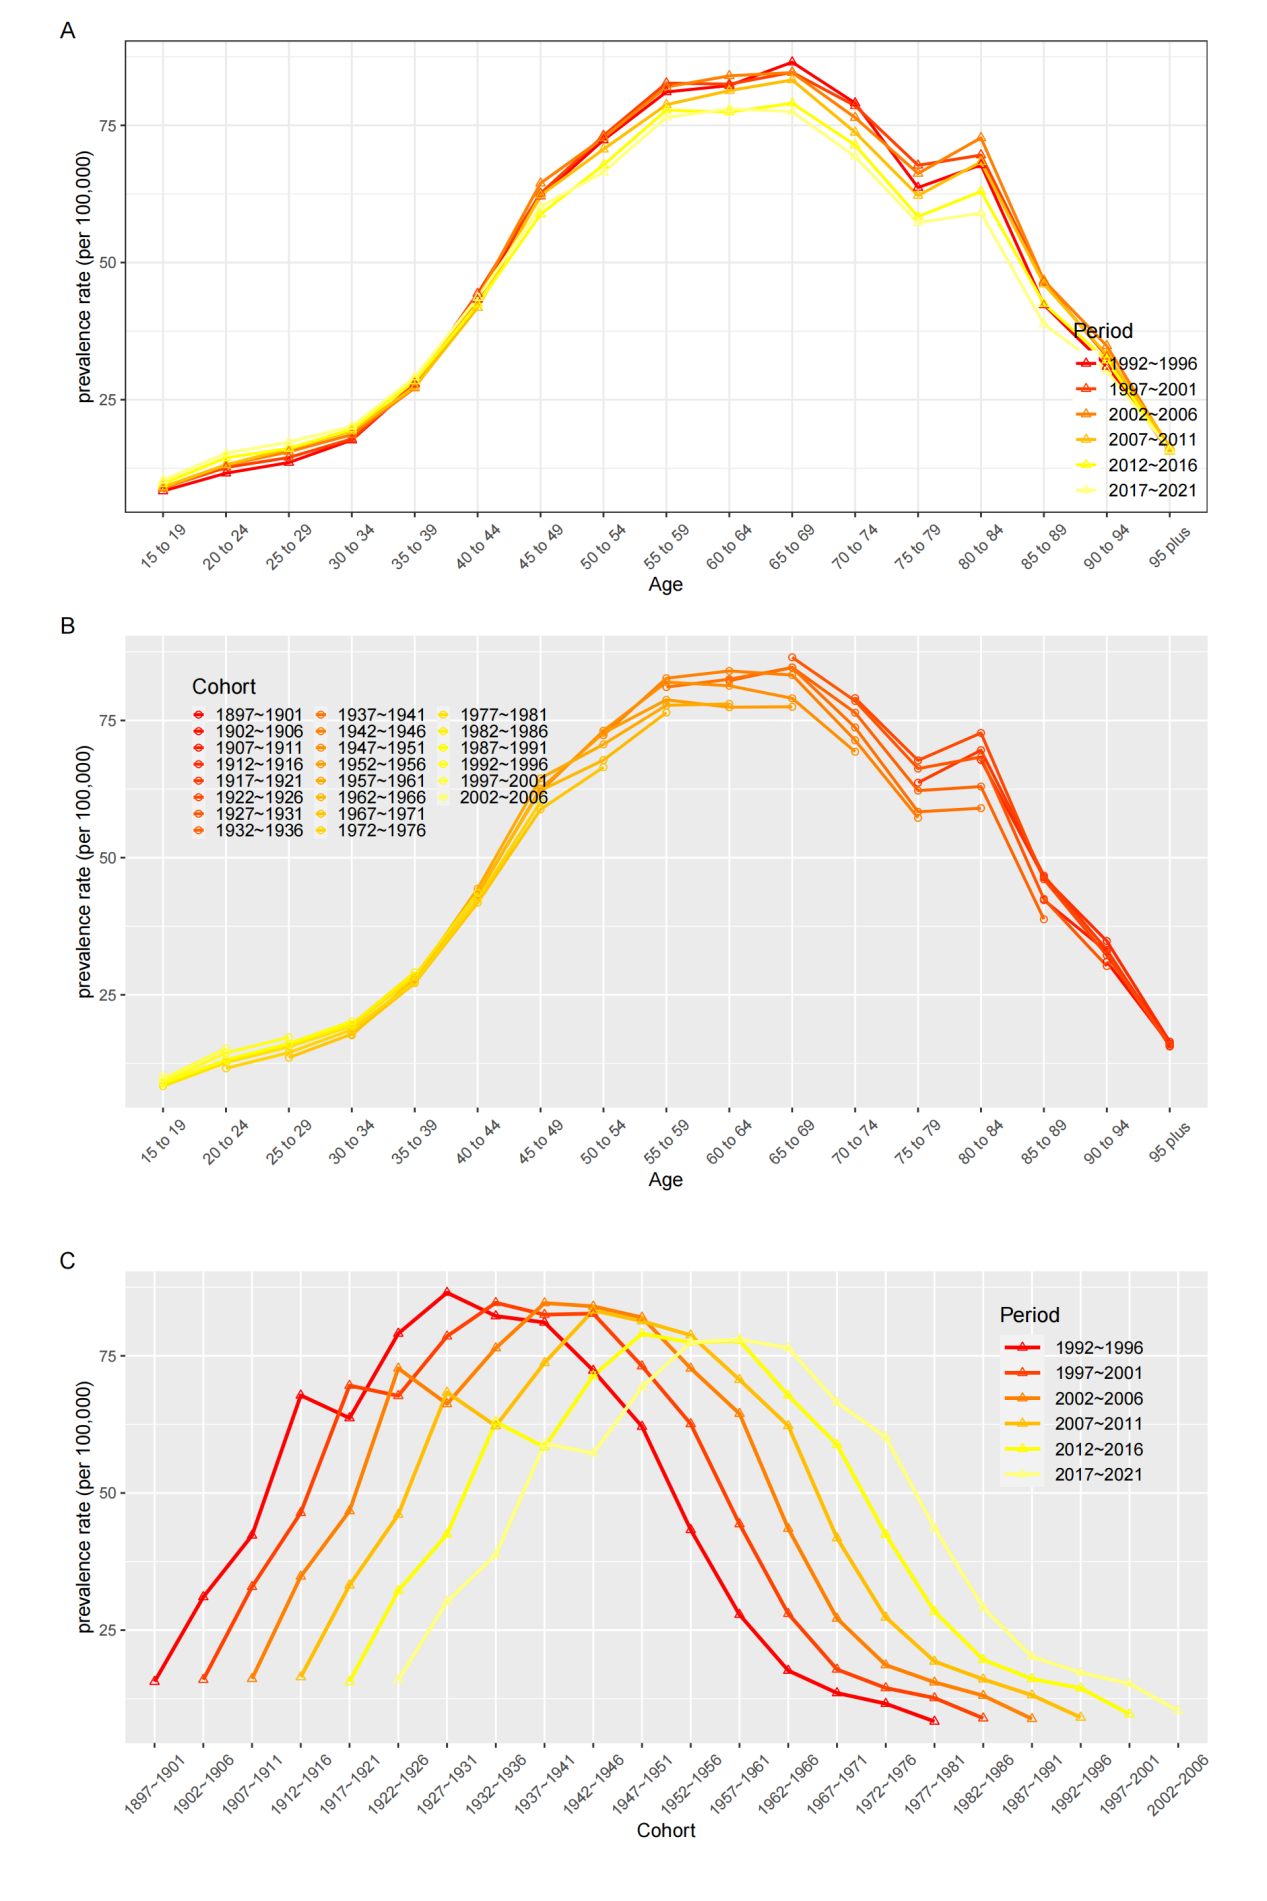


**Abbreviations:** OC, ovarian cancer.

**Figure S3.** The global trends of case number, crude rate and age-standardized rate of incidence, prevalence and DALYs of OC from 1990 to 2021.


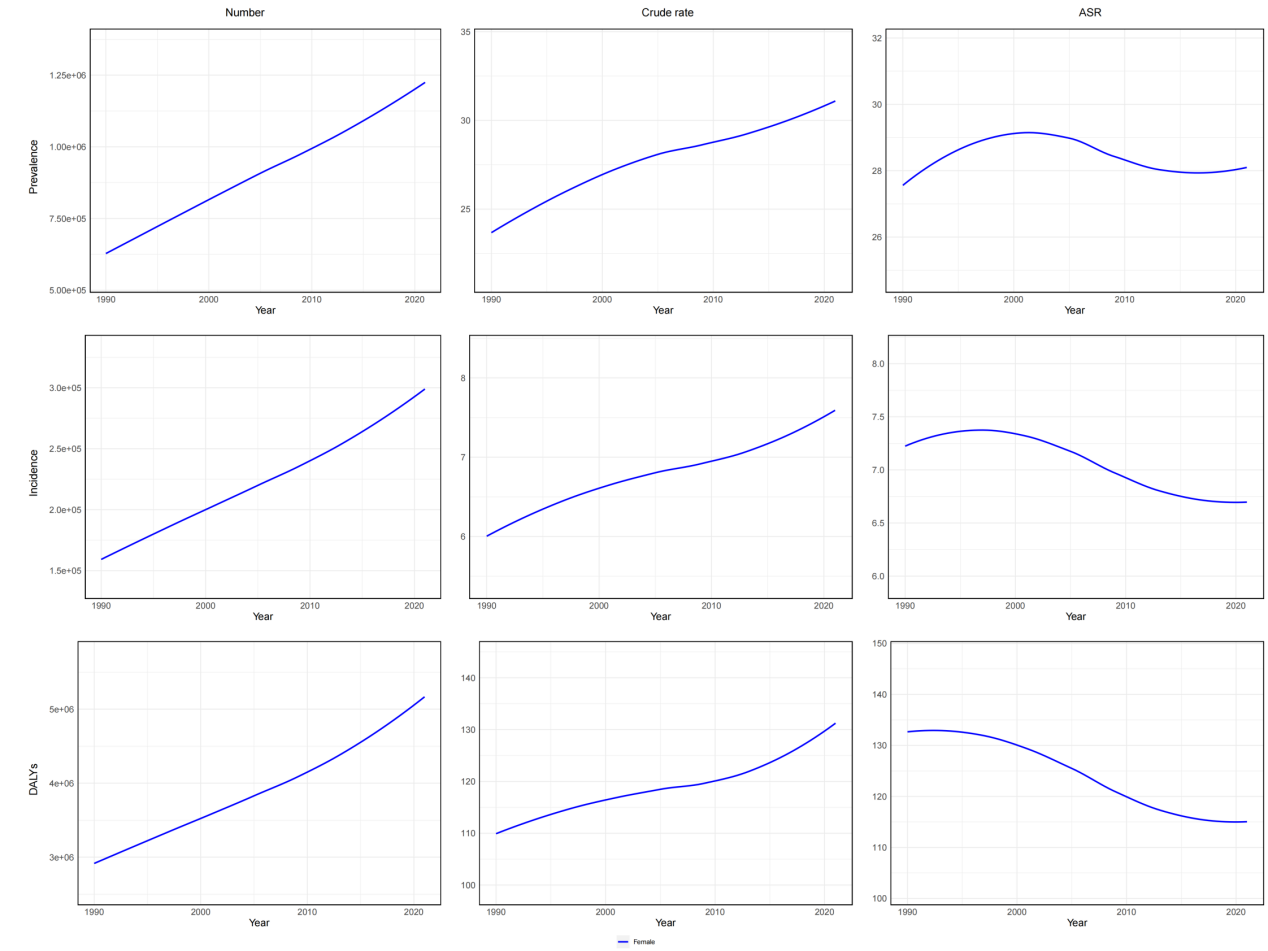


**Abbreviations:** DALYs, disability-adjusted life-years; OC,ovarian cancer.
